# Supplementary material
Source: publisher figshare collection journal article supplement (https://acs.figshare.com/ndownloader/files/3867937)
Supplement: Supplementary file 1 [file 3867937]

# Versatile 2-Methoxyethylaminobis(phenolate)yttrium Catalysts: Catalytic Precision Polymerization of Polar Monomers via Rare Earth Metal-Mediated Group Transfer Polymerization

Peter T. Altenbuchner<sup>†</sup>, Benedikt S. Soller<sup>†</sup>, Stefan Kissling<sup>†</sup>, Thomas Bachmann<sup>†</sup>, Alexander Kronast<sup>†</sup>, Sergei I. Vagin<sup>†</sup>, Bernhard Rieger<sup>†\*</sup>

<sup>†</sup>WACKER-Lehrstuhl für Makromolekulare Chemie, Technische Universität München, Lichtenbergstraße 4, 85748 Garching bei München, Germany

## Table of Contents

|                                                                                  |    |
|----------------------------------------------------------------------------------|----|
| 1. General Information                                                           | 2  |
| 2. Analytical Data                                                               | 4  |
| 2.1 Nuclear Magnetic Resonance Spectroscopy (NMR)                                | 4  |
| 2.2 Kinetic Data                                                                 | 9  |
| 2.3 Endgroup Analysis                                                            | 13 |
| 2.4 LCST (Lower critical solution temperature)                                   | 14 |
| 2.5 Eyring-Plot Data                                                             | 15 |
| 2.6 Thermogravimetric analysis (TGA) and Differential scanning calorimetry (DSC) | 16 |
| 2.7 Gel-permeation chromatography (GPC) Data                                     | 17 |
| 2.7.1 Homopolymerization                                                         | 17 |
| 2.7.2 Block copolymerization                                                     | 26 |

## 1. General Information

### Activity Measurements and Kinetic Analysis in the *in situ* ATR-IR:

For activity measurements, the stated amount of catalyst (42 – 135  $\mu\text{mol}$ ) is dissolved in 5 mL of dichloromethane, and the reaction mixture is transferred into the *in situ* IR autoclave and thermostatted to the desired temperature. Then, the stated amount of monomer (4.3-27 mmol) is added. During the course of the experiment the temperature is kept at the desired temperature ( $\pm 1$  K). In case of block copolymerization experiments, an aliquot sample is taken after complete conversion of the first monomer A for GPC-MALS analysis. Monomer B (4.3 mmol) is added subsequently and the reaction mixture is stirred until full conversion. After the stated reaction time, the reaction is quenched by addition of wet chloroform (0.5 mL) and an aliquot is taken to determine the conversion. The polymer is precipitated in excess hexane, filtered off and freeze dried from distilled  $\text{H}_2\text{O}$ .

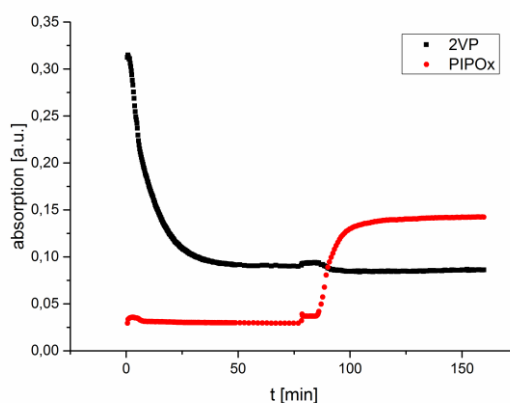

**Figure S 1 ATR-IR block copolymerization experiment with block A P2VP ( $802\text{ cm}^{-1}$ ) and block B PIPOx ( $1607\text{ cm}^{-1}$ ).**

The block copolymerization of 2VP and PIPOx was monitored in the ATR-IR (Figure S 1) through which the decrease of 2VP to complete conversion and the increase of PIPOx could be observed. The polymerization of IPOx was initiated immediately after the addition and preceded to full conversion within 30 minutes.

### **Sequential copolymerization**

After dissolving the calculated amount of catalyst in dichloromethane at room temperature, the first monomer was added. The reaction mixture was stirred for 2 hours. One aliquot was taken and quenched by the addition of 0.5 mL MeOH while the calculated amount of a second monomer was added to the reaction solution and stirred for another 2 hours at room temperature (in case of DMAA: at  $-78\text{ }^{\circ}\text{C}$ ) and quenched by addition of 0.5 mL MeOH. The polymers were precipitated by addition of the reaction mixtures to hexane (150 mL) and decanted from solution. Residual solvents were removed by drying the polymers under vacuum at  $60\text{ }^{\circ}\text{C}$  overnight.

### **Molecular weight determination**

GPC was carried out on a Varian LC-920 equipped with two PL Polargel columns. As eluent a mixture of 50% THF, 50% water, and 9 g L<sup>-1</sup> tetrabutylammonium bromide (TBAB) was used in the case of PDEVp, PIPOx, P2VP, P(2VP-b-PDEVp), P(2VP-b-PIPOx), P(2VP-b-PDMAA) and P(2VP-b-DEVp); for PDIVP analysis, the eluent was THF with 6 g L<sup>-1</sup> TBAB. Absolute molecular weights have been determined online by multiangle light scattering (MALS) analysis using a Wyatt Dawn Heleos II in combination with a Wyatt Optilab rEX as concentration source.

GPC for Polyhydroxybutyrate samples was carried on a Polymer Laboratories GPC50 Plus chromatograph. As eluent, chloroform with 1.5 g L<sup>-1</sup> tetrabutylammonium tetrafluoroborate was used. Polystyrene standards were used for calibration.

### **Kinetics by aliquots method**

In the Glovebox the calculated amount of catalyst was dissolved in 20mL toluene at room temperature and the calculated amount of monomer was added in one injection. Aliquots were taken from the reaction solution at regular time intervals and quenched by addition to MeOH. For each aliquot, the conversion is determined by gravimetry or <sup>1</sup>H NMR spectroscopy and the molecular weight of the formed polymer by GPC-MALS analysis.

## 2. Analytical Data

### 2.1 Nuclear Magnetic Resonance Spectroscopy (NMR)

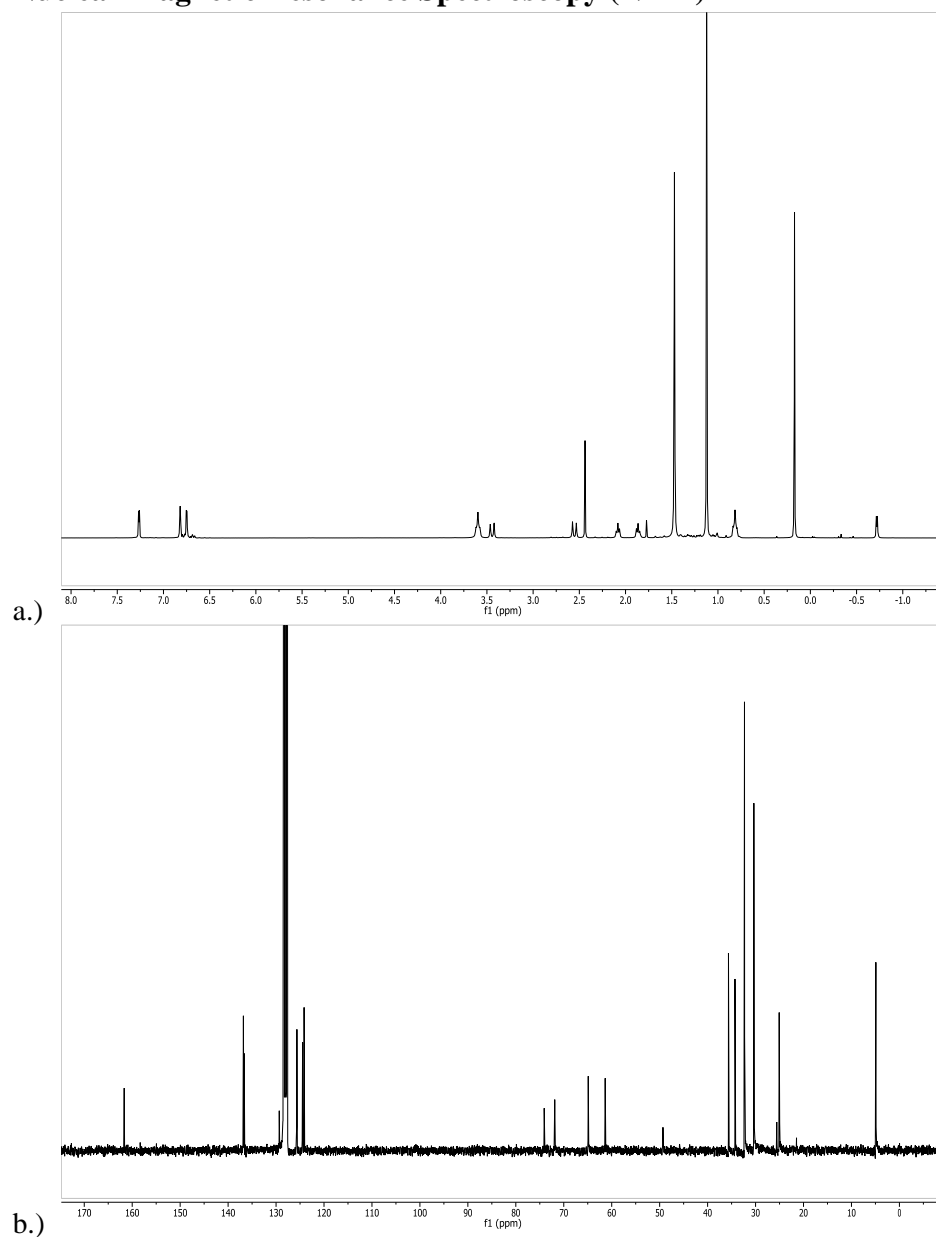

Figure S 2 a.)  $^1\text{H}$  NMR spectrum b.)  $^{13}\text{C}$  NMR spectrum of catalyst  $(\text{ONOO})^t\text{BuY}(\text{CH}_2\text{Si}(\text{CH}_3)_3)(\text{thf})$  in  $\text{C}_6\text{D}_6$ .

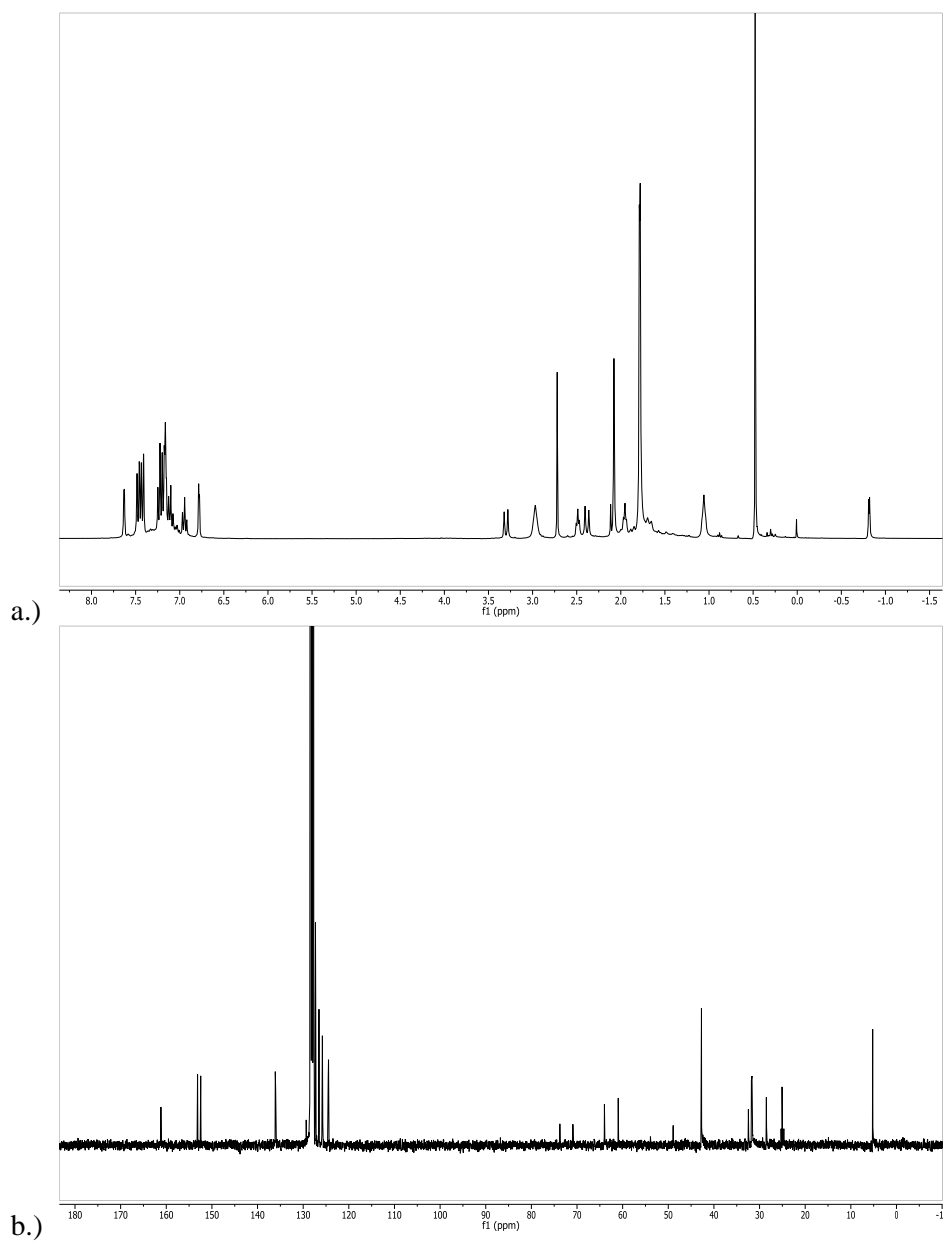

Figure S 3 a.)  $^1\text{H}$  NMR spectrum b.)  $^{13}\text{C}$  NMR spectrum of catalyst  $(\text{ONOO})^{\text{CMe}_2\text{Ph}}\text{Y}(\text{CH}_2\text{Si}(\text{CH}_3)_3)(\text{thf})$  in  $\text{C}_6\text{D}_6$ .

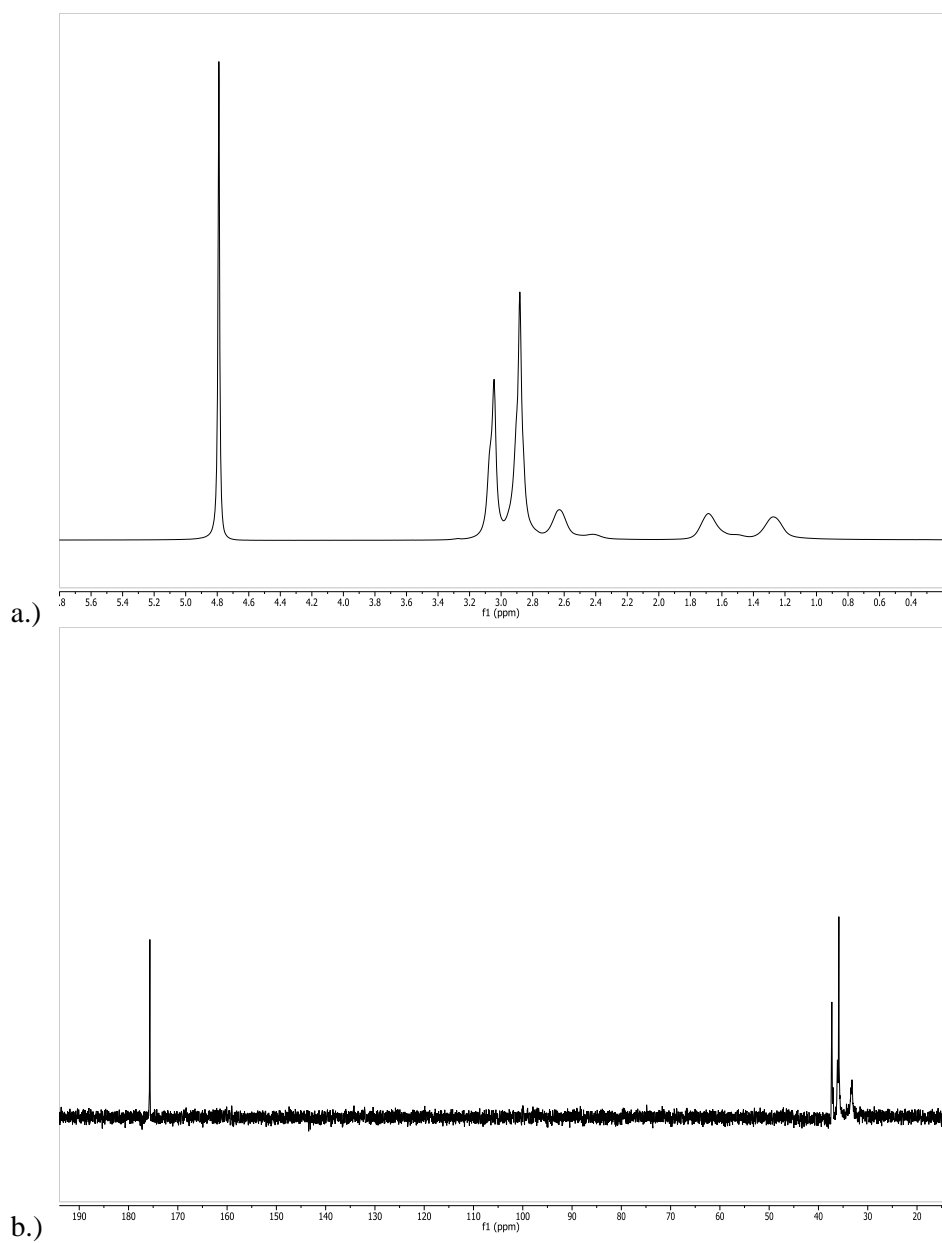

**Figure S 4  $^1\text{H}$  a.) and  $^{13}\text{C}$  b.) NMR spectra of PDMAA in  $\text{D}_2\text{O}$ .**

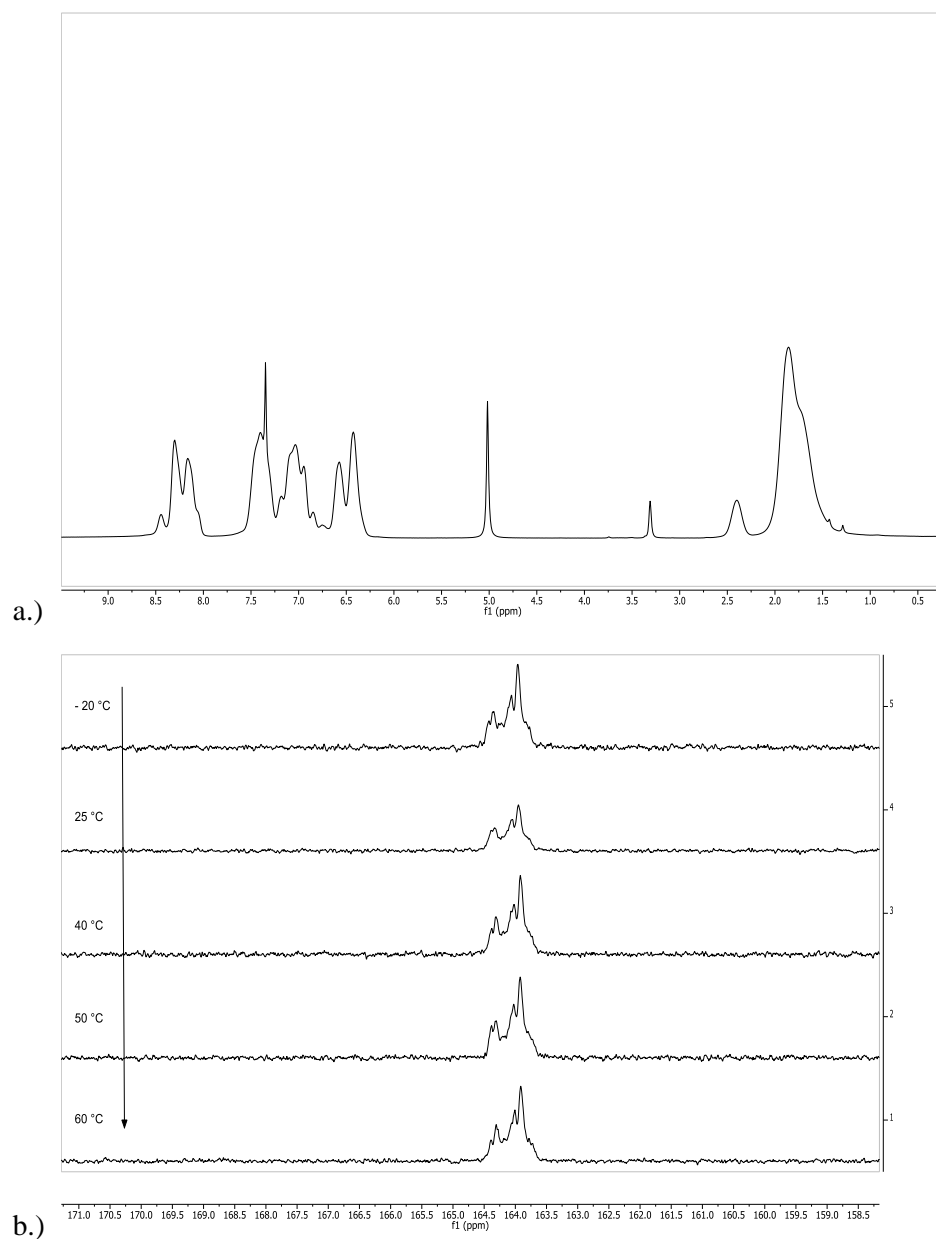

**Figure S 5 a.)  $^1\text{H}$  NMR P2VP b.) Polymer samples synthesized at different temperatures. Aromatic quaternary  $^{13}\text{C}$  NMR resonances of P2VP in  $\text{CDCl}_3$  measured at 25 °C.<sup>1</sup>**

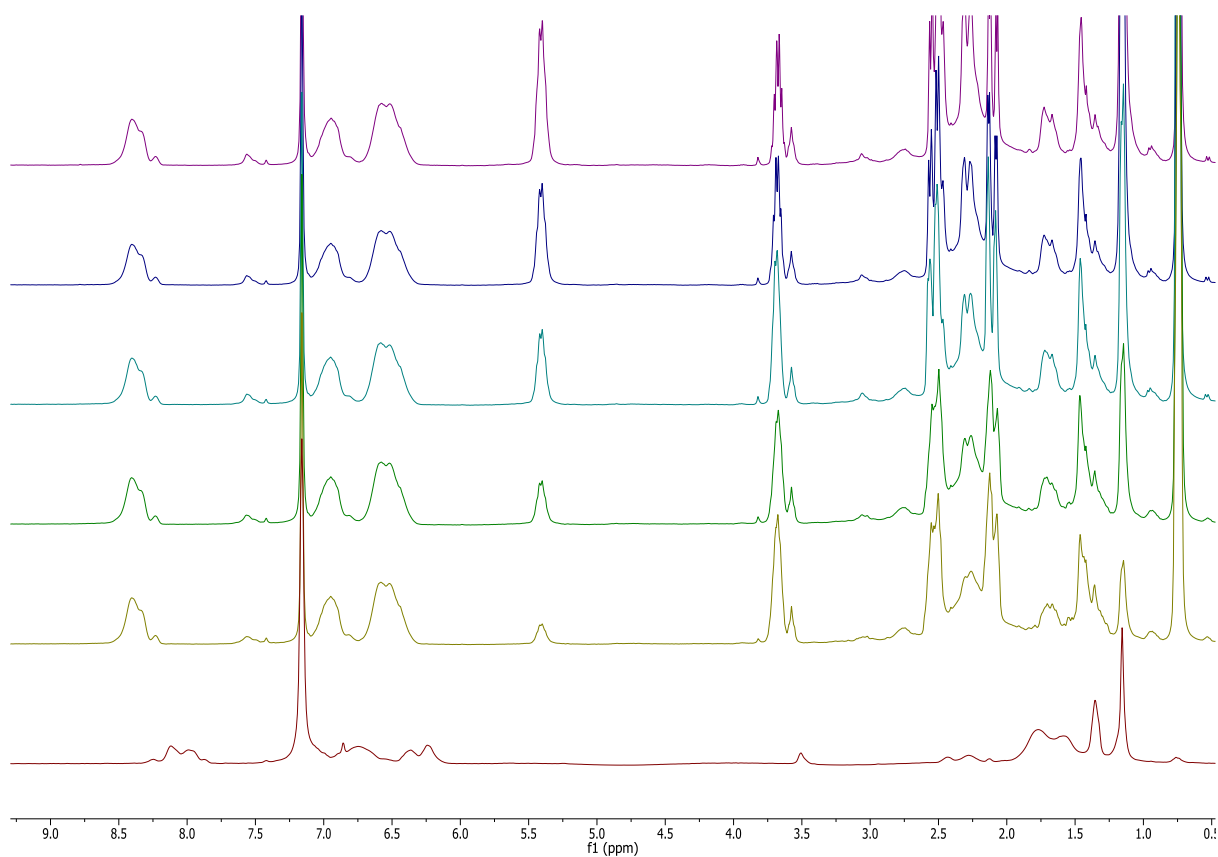

**Figure S 6**  $^1\text{H}$  NMR experiment with  $(\text{ONOO})^{\text{tBu}}\text{Y}(\text{CH}_2\text{Si}(\text{CH}_3)_3)(\text{thf})$  (catalyst 13  $\mu\text{mol}$ , 2VP 0.14 mmol, BL 0.14 mmol,  $\text{C}_6\text{D}_6$  0.5 mL,  $T = 25^\circ\text{C}$ ): Polymerization of monomer A (P2VP) and subsequent polymerization of monomer B (BL).

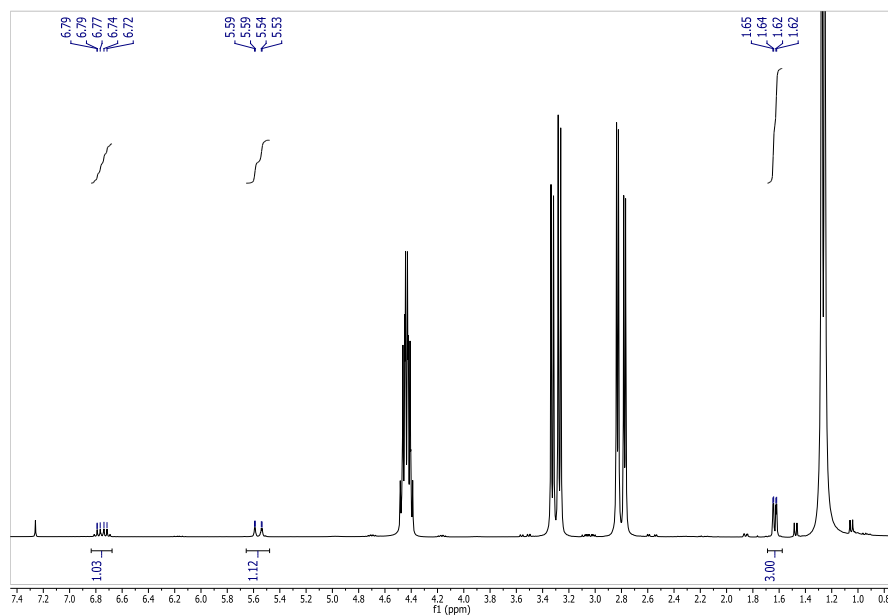

**Figure S 7**  $^1\text{H}$  NMR of BL with traces of crotonic acid in  $\text{CDCl}_3$ .



## 2.2 Kinetic Data

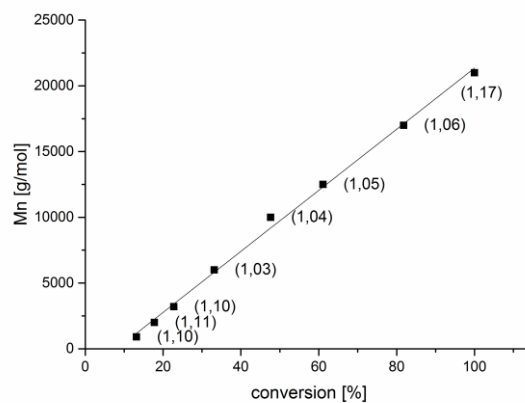

**Figure S 8** Growth of the absolute molecular weight ( $M_n$ ) determined by GPC-MALS as a function of monomer conversion (determined gravimetrically), respective PDI values shown in brackets: catalyst 1, 135  $\mu\text{mol}$ , IPOx 27 mmol, toluene 20 mL, 25  $^{\circ}\text{C}$ .

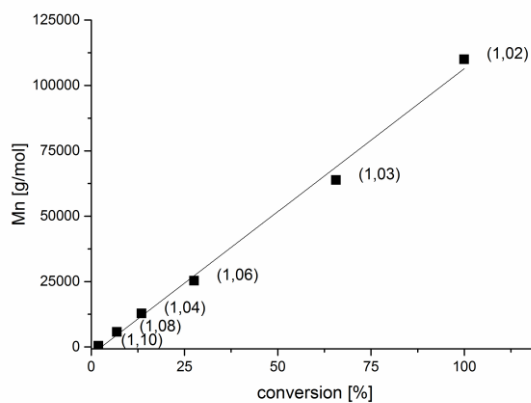

**Figure S 9** Growth of the absolute molecular weight ( $M_n$ ) determined by GPC-MALS as a function of monomer conversion (determined gravimetrically), respective PDI values shown in brackets: catalyst 1, 43  $\mu\text{mol}$ , 2VP 27 mmol, toluene 20 mL, 25  $^{\circ}\text{C}$ .

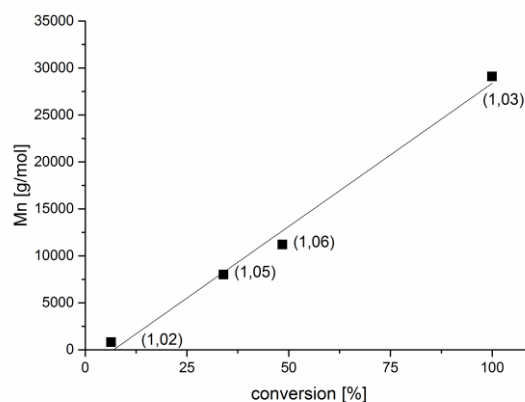

**Figure S 10** Growth of the absolute molecular weight ( $M_n$ ) determined by GPC-MALS as a function of monomer conversion (determined gravimetrically), respective PDI values shown in brackets: catalyst 2, 43  $\mu\text{mol}$ , 2VP 135 mmol, toluene 20 mL, 25  $^{\circ}\text{C}$ .

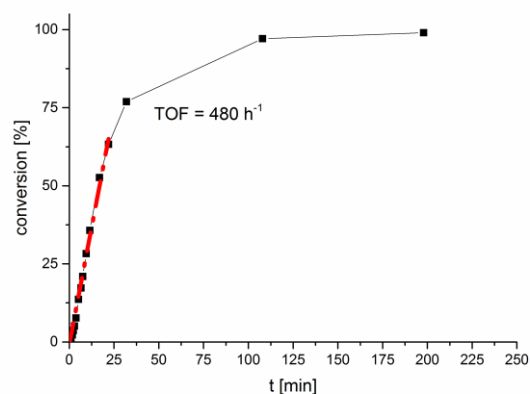

**Figure S 11** Determination of catalytic activity of  $(\text{ONOO})^{\text{tBu}}\text{Y}(\text{CH}_2\text{Si}(\text{CH}_3)_3)(\text{thf})$  (catalyst 135  $\mu\text{mol}$ , DEVP 27 mmol, toluene 20 mL,  $T = 25\text{ }^\circ\text{C}$ ).

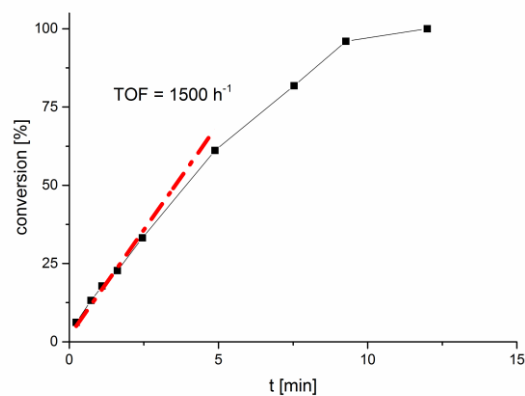

**Figure S 12** Determination of catalytic activity of  $(\text{ONOO})^{\text{tBu}}\text{Y}(\text{CH}_2\text{Si}(\text{CH}_3)_3)(\text{thf})$  (catalyst 135  $\mu\text{mol}$ , IPOx 27 mmol, toluene 20 mL,  $T = 25\text{ }^\circ\text{C}$ ).

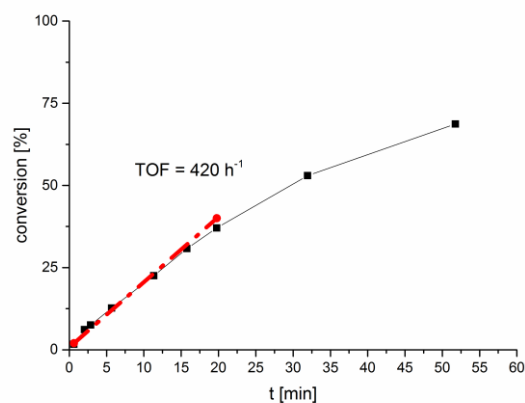

**Figure S 13** Determination of catalytic activity of  $(\text{ONOO})^{\text{tBu}}\text{Y}(\text{CH}_2\text{Si}(\text{CH}_3)_3)(\text{thf})$  (catalyst 43  $\mu\text{mol}$ , 2VP 27 mmol, toluene 20 mL,  $T = 25\text{ }^\circ\text{C}$ ).

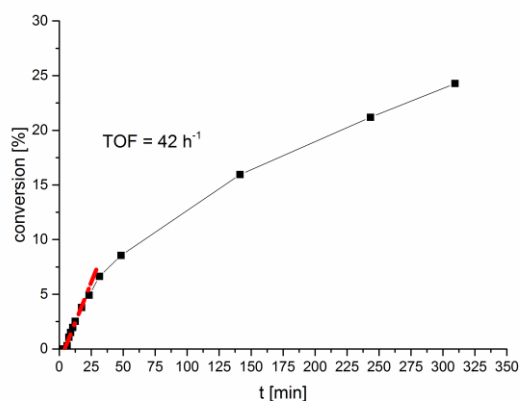

Figure S 14 Determination of catalytic activity of  $(\text{ONOO})^{\text{tBu}}\text{Y}(\text{CH}_2\text{Si}(\text{CH}_3)_3)(\text{thf})$  (catalyst 135  $\mu\text{mol}$ , DIVP 27 mmol, toluene 20 mL,  $T = 25^\circ\text{C}$ ).

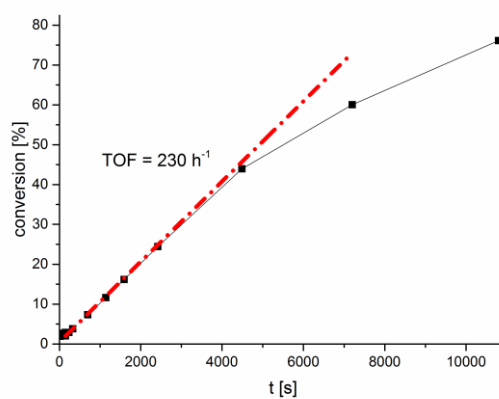

Figure S 15 Determination of catalytic activity of  $(\text{ONOO})^{\text{CMe}_2\text{Ph}}\text{Y}(\text{CH}_2\text{Si}(\text{CH}_3)_3)(\text{thf})$  (catalyst 43  $\mu\text{mol}$ , 2VP 27 mmol, toluene 20 mL,  $T = 25^\circ\text{C}$ ).

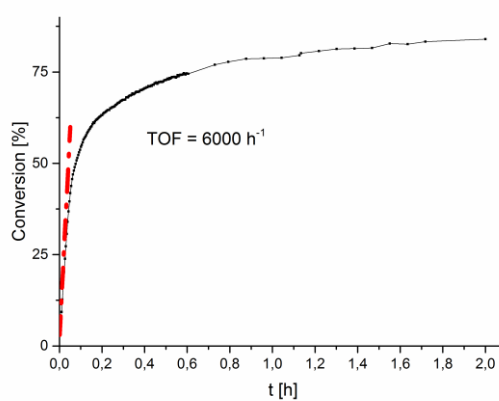

Figure S 16 Determination of catalytic activity of  $(\text{ONOO})^{\text{tBu}}\text{Y}(\text{CH}_2\text{Si}(\text{CH}_3)_3)(\text{thf})$  (catalyst 14.3  $\mu\text{mol}$ , BL 9 mmol, dichloromethane 5 mL,  $T = 25^\circ\text{C}$ ).

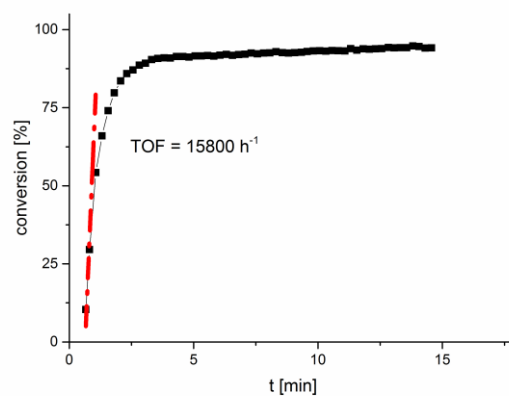

**Figure S 17** Determination of catalytic activity of  $(\text{ONOO})^{\text{CMe}_2\text{Ph}}\text{Y}(\text{CH}_2\text{Si}(\text{CH}_3)_3)(\text{thf})$  (catalyst  $14.3\ \mu\text{mol}$ , BL  $9\ \text{mmol}$ , dichloromethane  $5\ \text{mL}$ ,  $T = 25\ ^\circ\text{C}$ ).

## 2.3 Endgroup Analysis

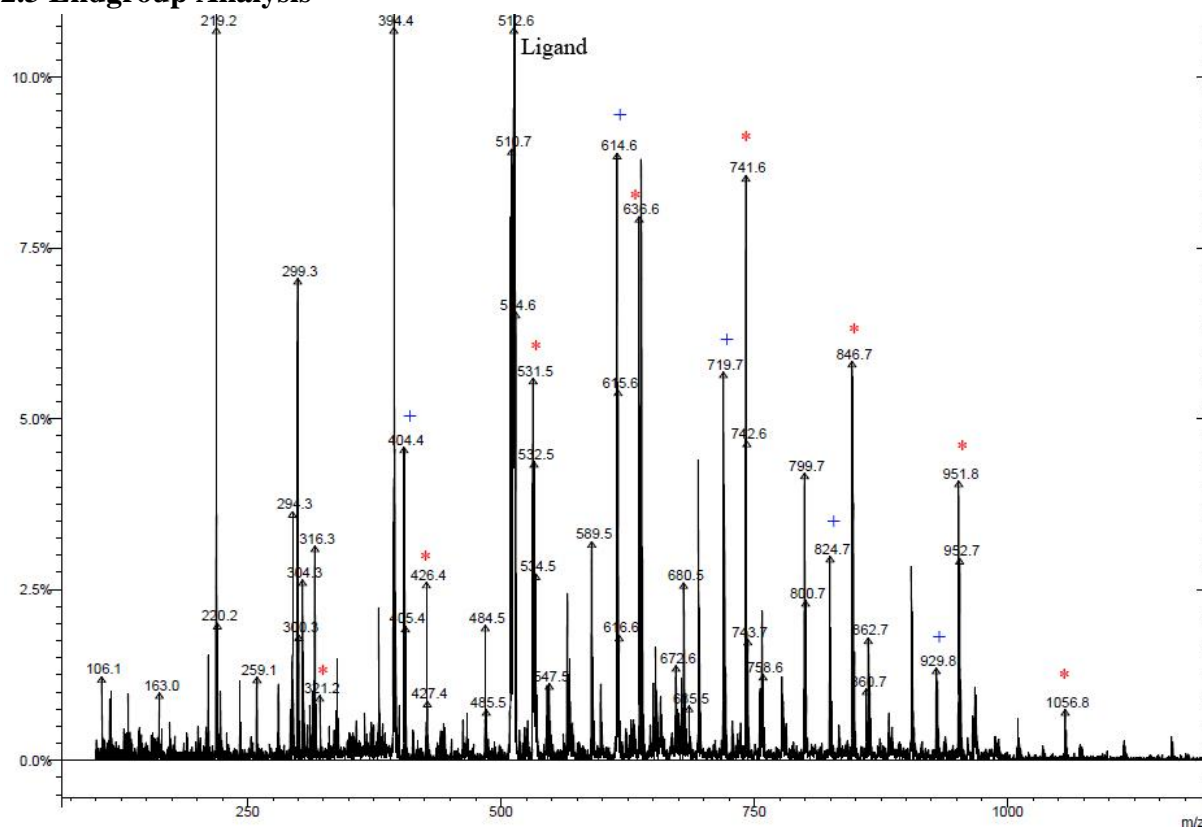

Figure S 18 Endgroup analysis ESI-MS measured in *i*PrOH; Catalyst 1 (40  $\mu$ mol of catalyst, 0.4 mmol 2VP, 0.5 mL  $C_6D_6$ , 20  $^{\circ}C$ ): (\*)  $[(n \times M) + (CH_2TMS) + (Na)]^+$  (+)  $[(n \times M) + (CH_2TMS) + H]^+$ .

## 2.4 LCST (Lower critical solution temperature)

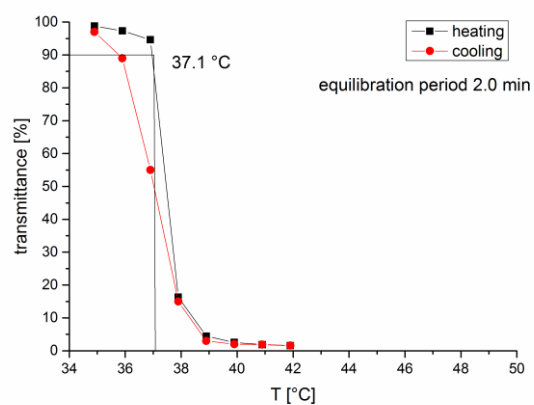

**Figure S 19** Determination of the cloud point (lower critical solution temperature, LCST) of P2VP homopolymer. The cloud point was determined at 10% decrease of transmittance for a 5.0 wt % dest. H<sub>2</sub>O:THF =1:1,  $M_n = 2.2 \times 10^4$  g/mol, PDI = 1.01.

## 2.5 Eyring-Plot Data

**Table S 1 Eyring plot for (ONOO)<sup>tBu</sup>Y(CH<sub>2</sub>Si(CH<sub>3</sub>)<sub>3</sub>)(thf) initiated 2VP (catalyst 42 µmol, 2VP 8.6 mmol, toluene 5.5 mL, temperature 298 – 331 K).**

| T [K] | v <sub>initial</sub> [mol/L] | c(Mon) [mol/L] | n(Mon) [mol] | k (L/mols) | ln(k/T)      | 1/T        |
|-------|------------------------------|----------------|--------------|------------|--------------|------------|
| 313   | 0,00215641                   | 1,177845       | 0,008560015  | 0,31321527 | -6,907067763 | 0,00319489 |
| 298   | 0,00043782                   | 1,177845       | 0,008560015  | 0,06359269 | -8,452350272 | 0,0033557  |
| 298   | 0,00046452                   | 1,177845       | 0,008560015  | 0,06747082 | -8,393153525 | 0,0033557  |
| 323   | 0,00557182                   | 1,177845       | 0,008560015  | 0,80929836 | -5,989239946 | 0,00309598 |
| 308   | 0,0014717                    | 1,177845       | 0,008560015  | 0,21376218 | -7,272990962 | 0,00324675 |
| 331   | 0,00997805                   | 1,177845       | 0,008560015  | 1,44929656 | -5,431040069 | 0,00302115 |

**Table S 2 Eyring plot for (ONOO)<sup>CM<sub>2</sub>Ph</sup>Y(CH<sub>2</sub>Si(CH<sub>3</sub>)<sub>3</sub>)(thf) initiated 2VP (catalyst 42 µmol, 2VP 8.6 mmol, toluene 5.5 mL, temperature 303 – 333 K).**

| T [K] | v <sub>initial</sub> [mmol/mL] | c(Mon) [mol/L] | n(Mon) [mol] | k (L/mols) | ln(k/T)      | 1/T        |
|-------|--------------------------------|----------------|--------------|------------|--------------|------------|
| 333   | 0,00774761                     | 1,177845       | 0,008560015  | 1,11611147 | -5,698291743 | 0,003003   |
| 313   | 0,00108568                     | 1,177845       | 0,008560015  | 0,15640177 | -7,601530334 | 0,00319489 |
| 323   | 0,00198724                     | 1,177845       | 0,008560015  | 0,28627943 | -7,028439244 | 0,00309598 |
| 303   | 0,00026055                     | 1,177845       | 0,008560015  | 0,03753452 | -8,996226965 | 0,00330033 |
| 341   | 0,01309903                     | 1,177845       | 0,008560015  | 1,88703067 | -5,196877958 | 0,00293255 |

## 2.6 Thermogravimetric analysis (TGA) and Differential scanning calorimetry (DSC)

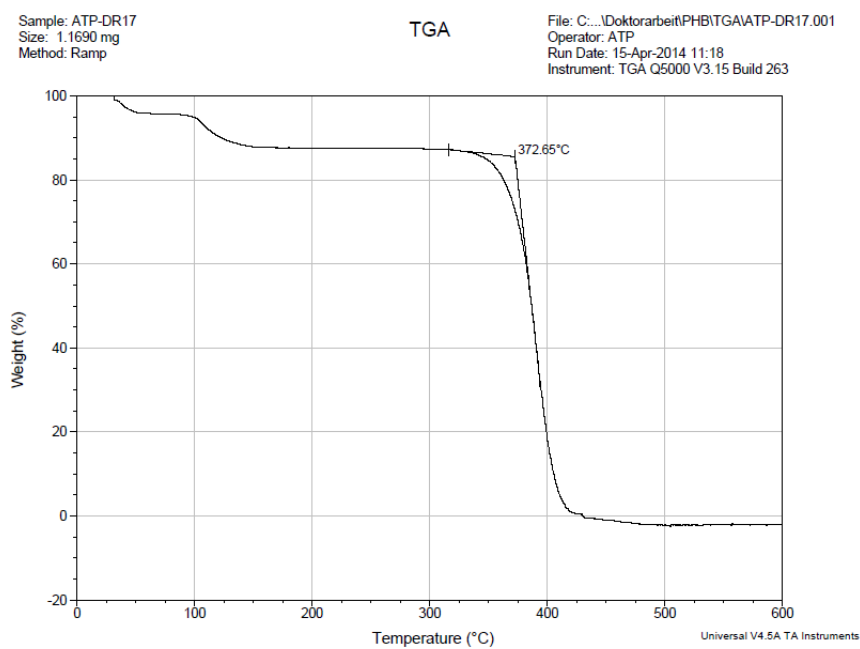

Figure S 20 TGA thermogram for P2VP reported in table 2, entry 2

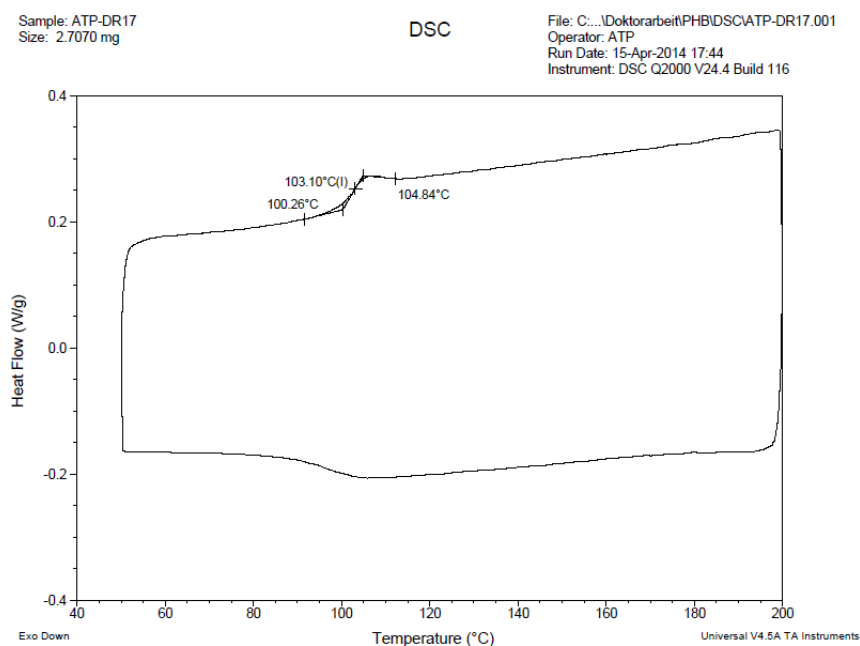

Figure S 21 DSC thermogram for P2VP reported in table 2, entry 2.



## 2.7 Gel-permeation chromatography (GPC) Data

### 2.7.1 Homopolymerization

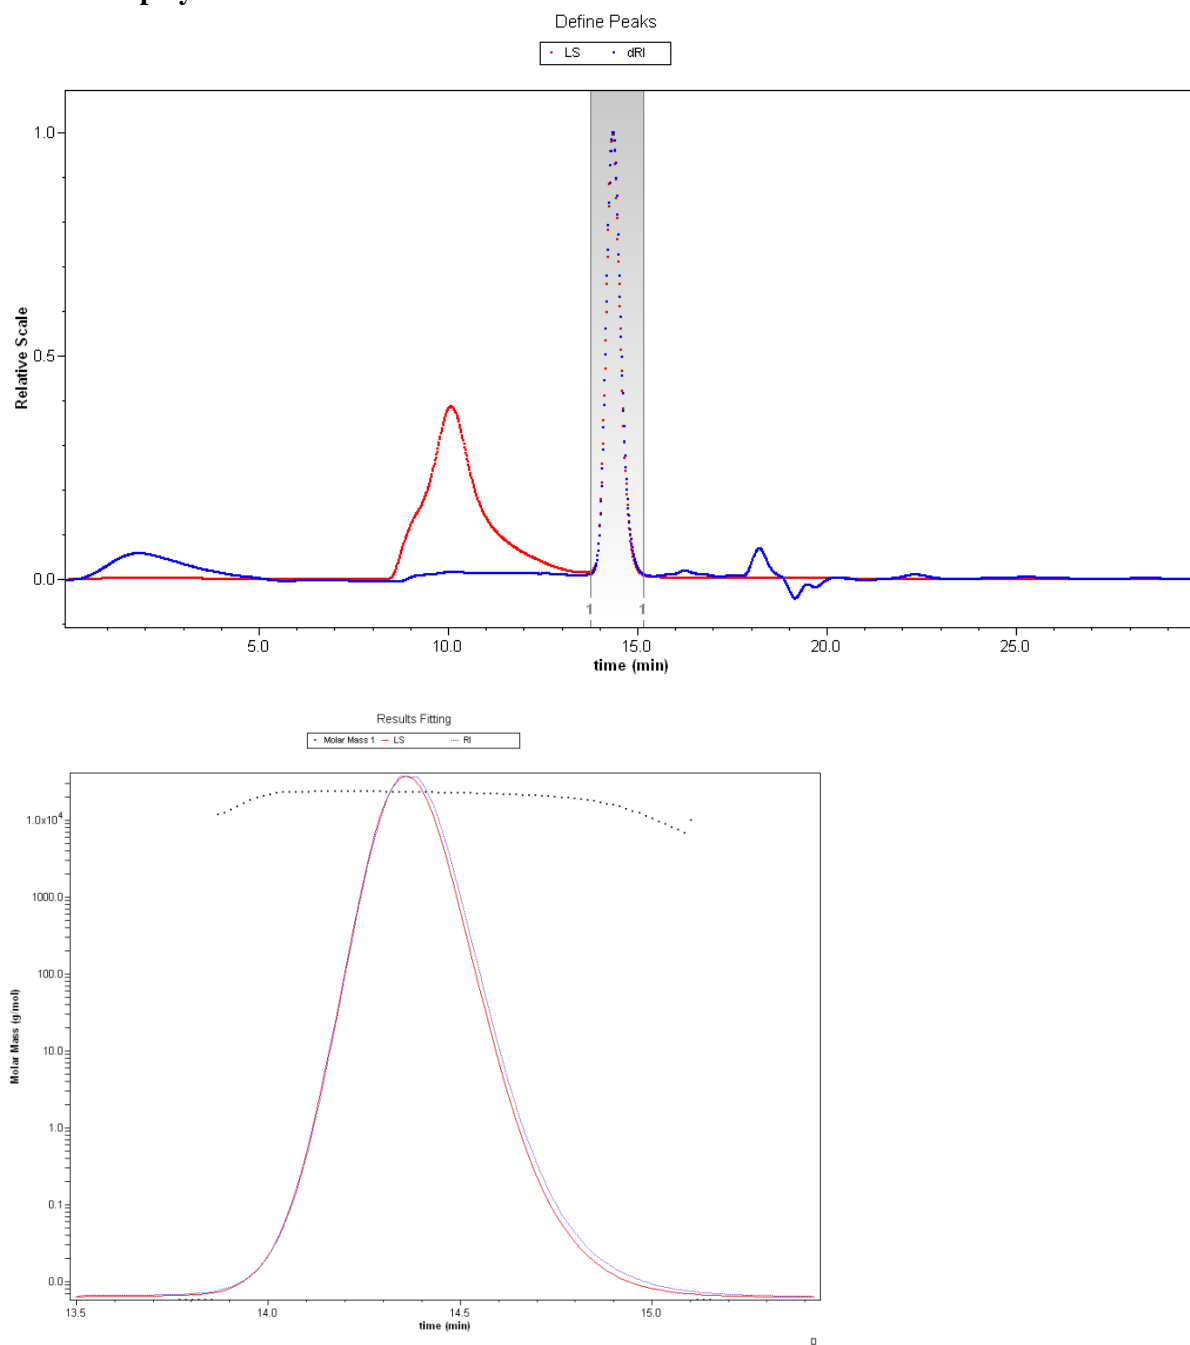

Figure S 22 REM-GTP (2VP), table 1, entry 1, conversion 99%.

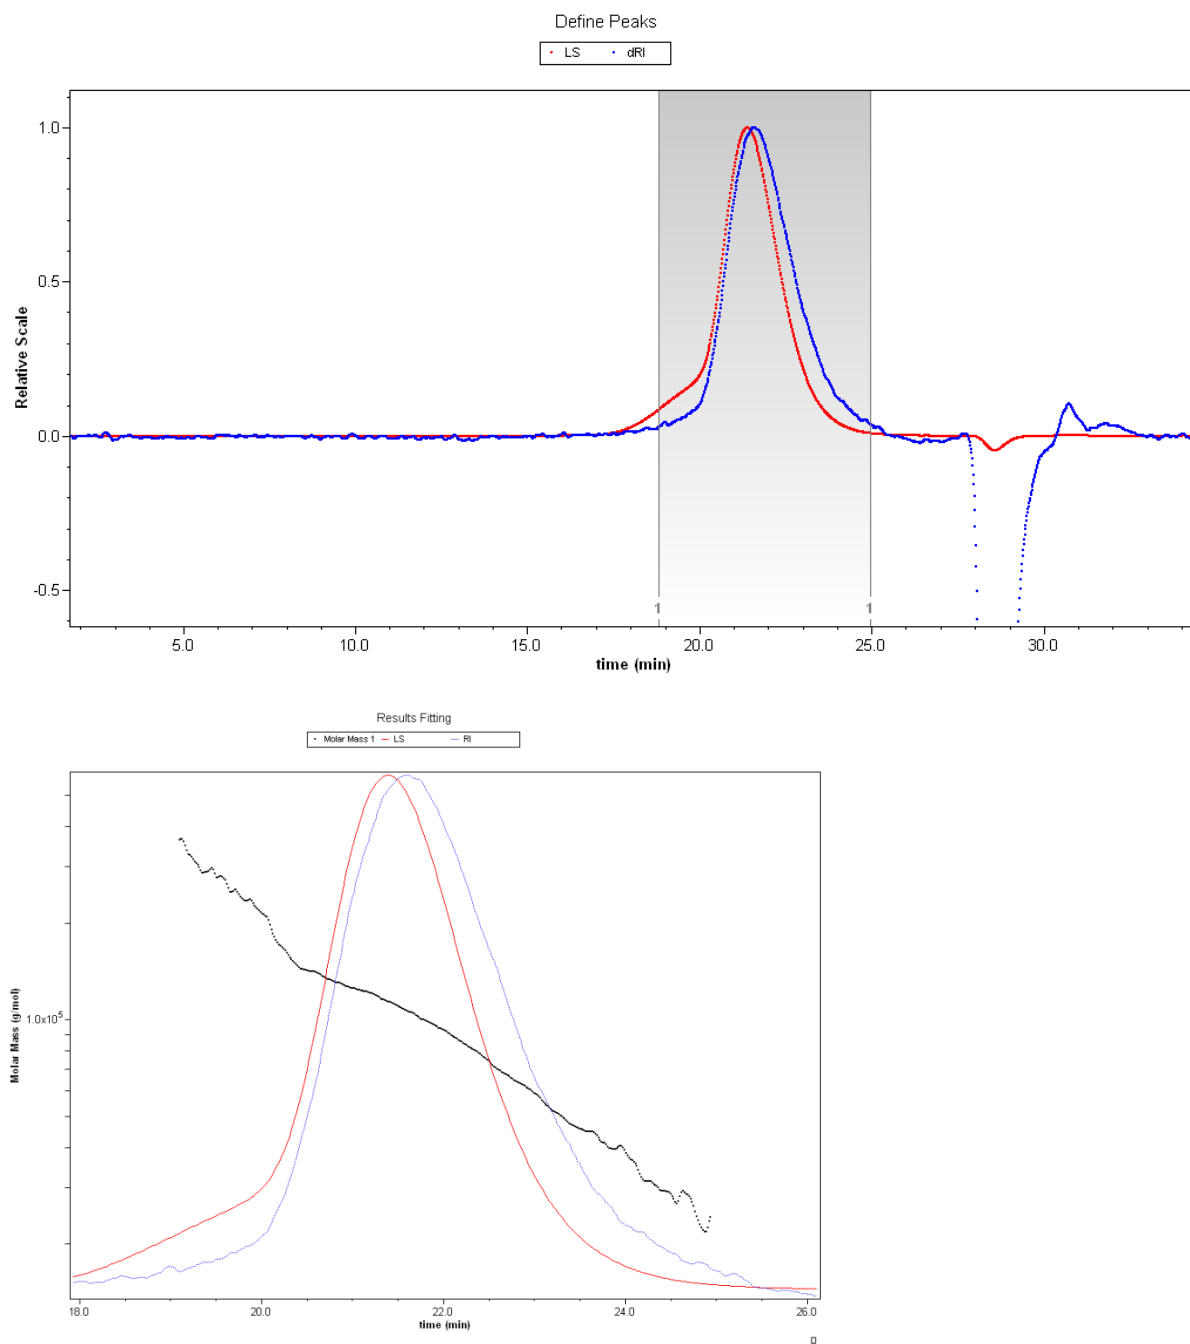

Figure S 23 REM-GTP (DEVP), table 1, entry 2, conversion 99%.

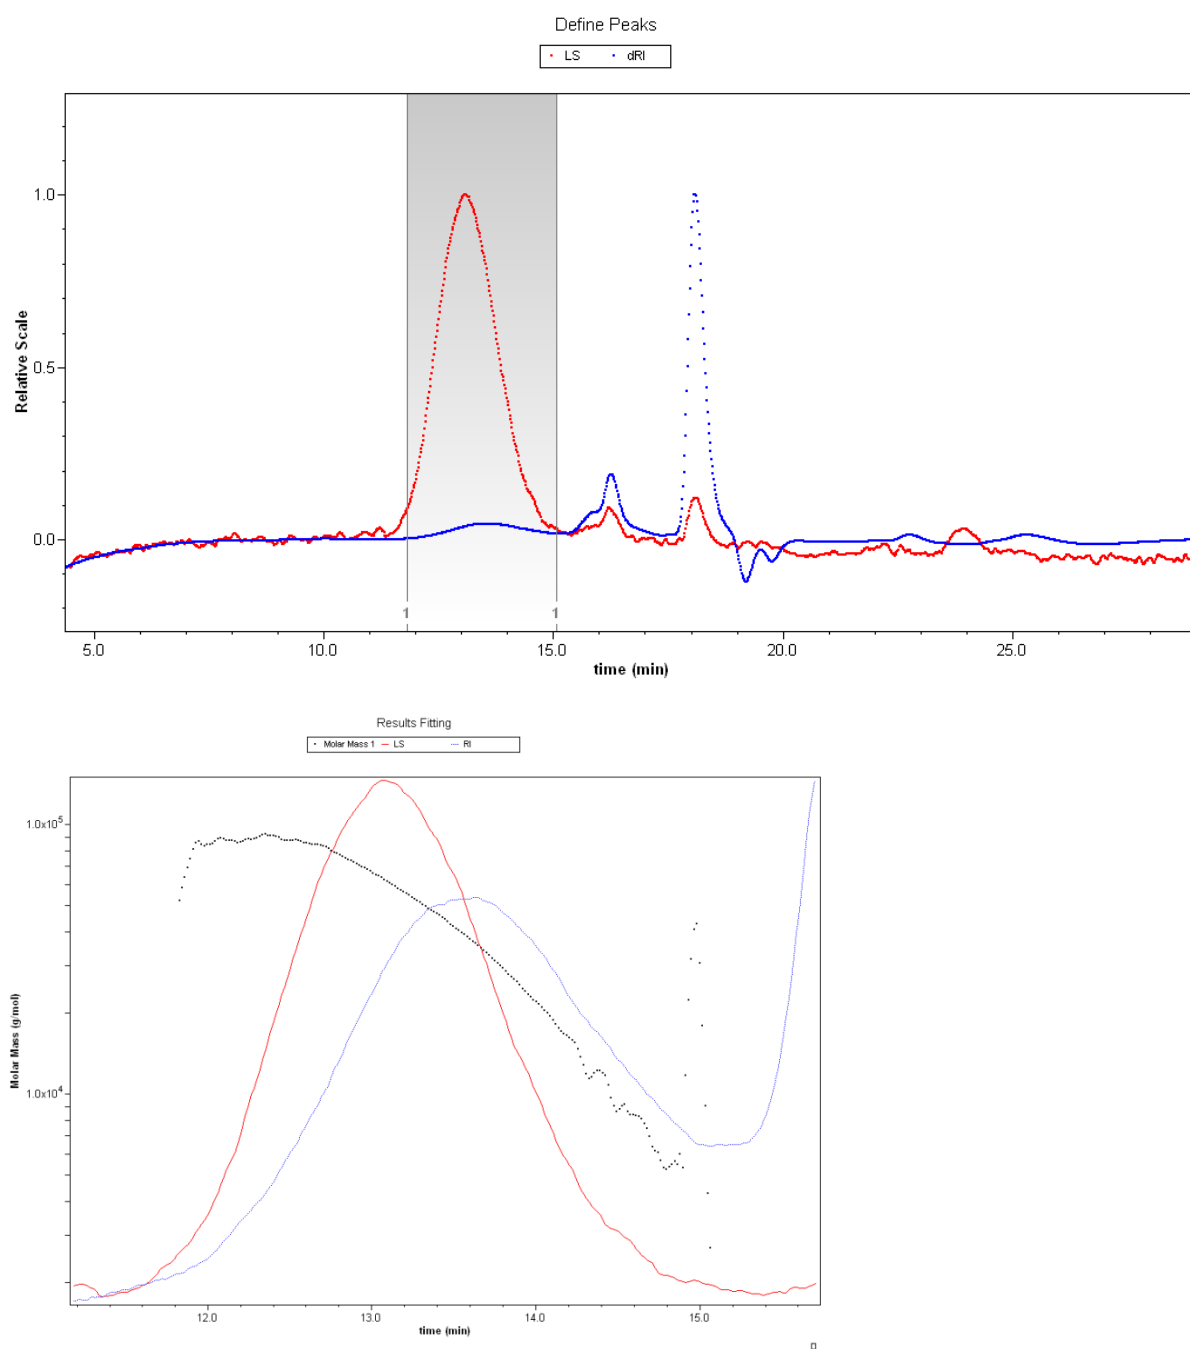

**Figure S 24 REM-GTP (DIVP), table 1, entry 3, conversion 25%.**

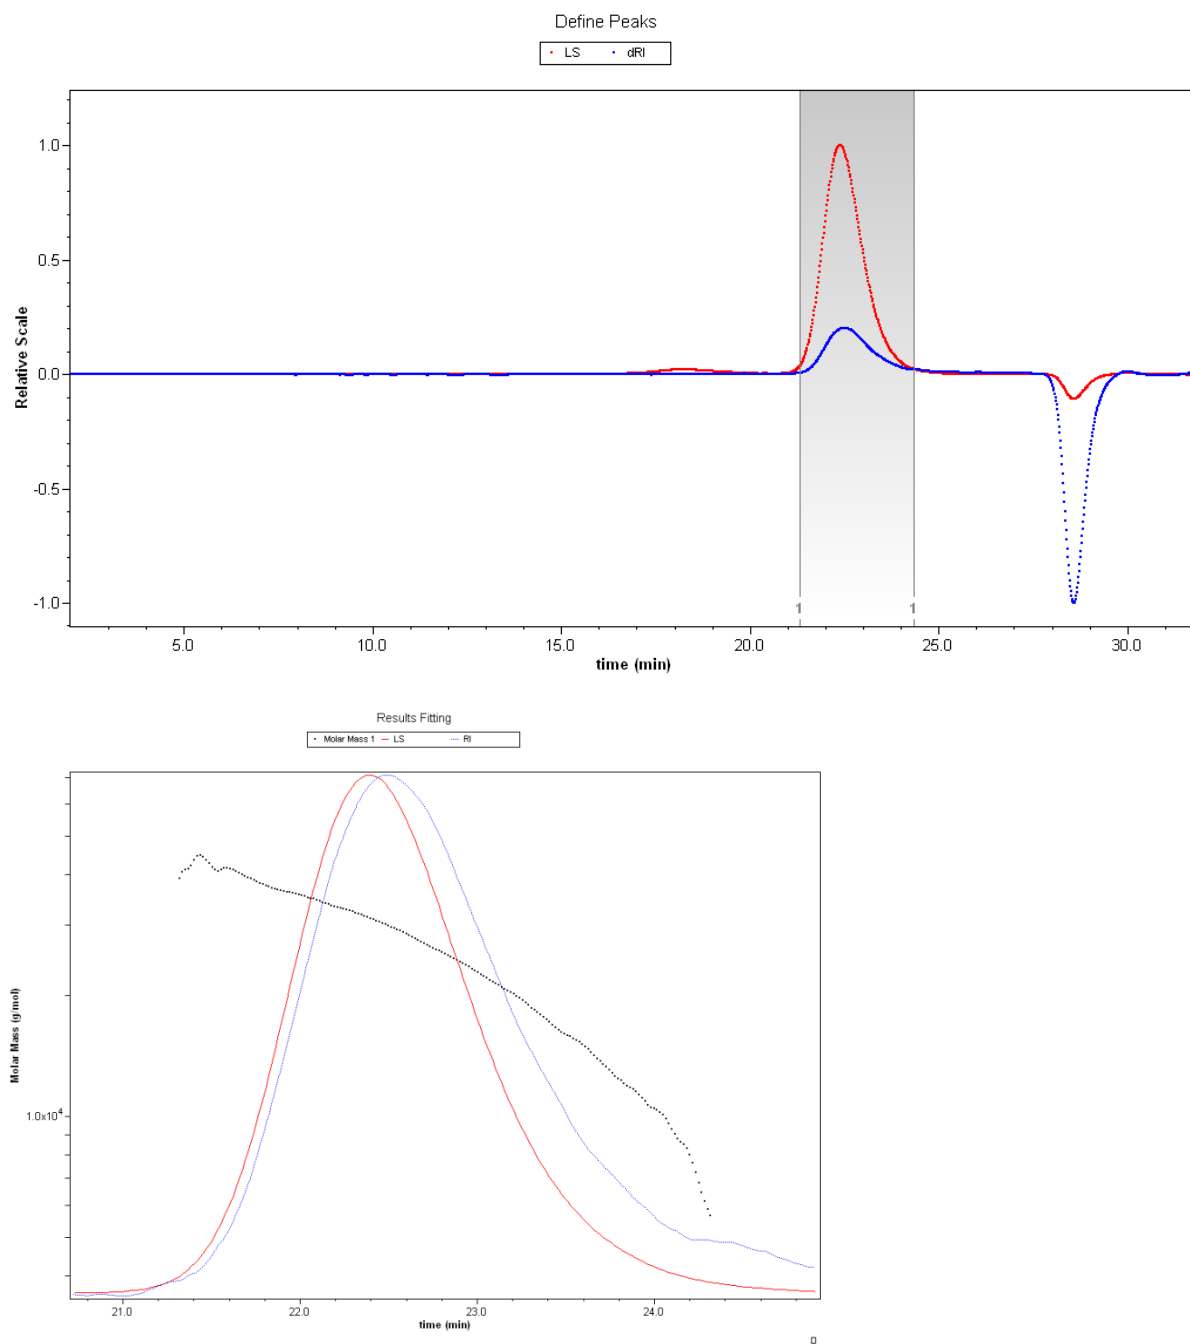

**Figure S 25 REM-GTP (IPOx), table 1, entry 4, conversion 99%.**

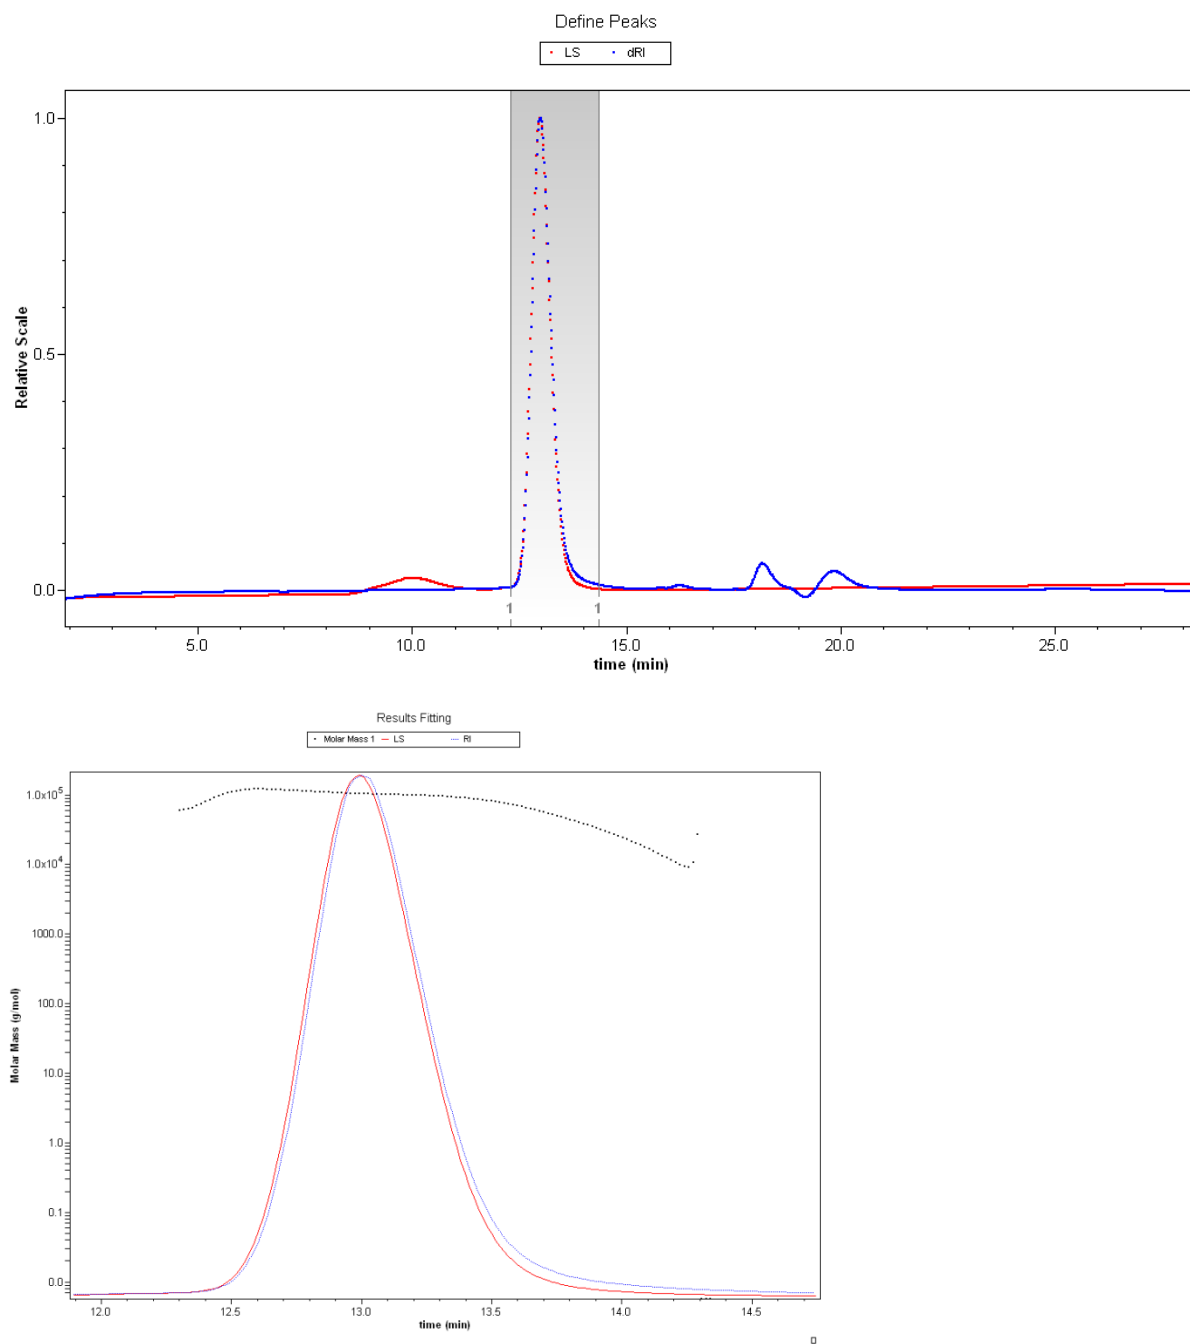

**Figure S 26 REM-GTP (2VP), table 1, entry 5, conversion 99%.**

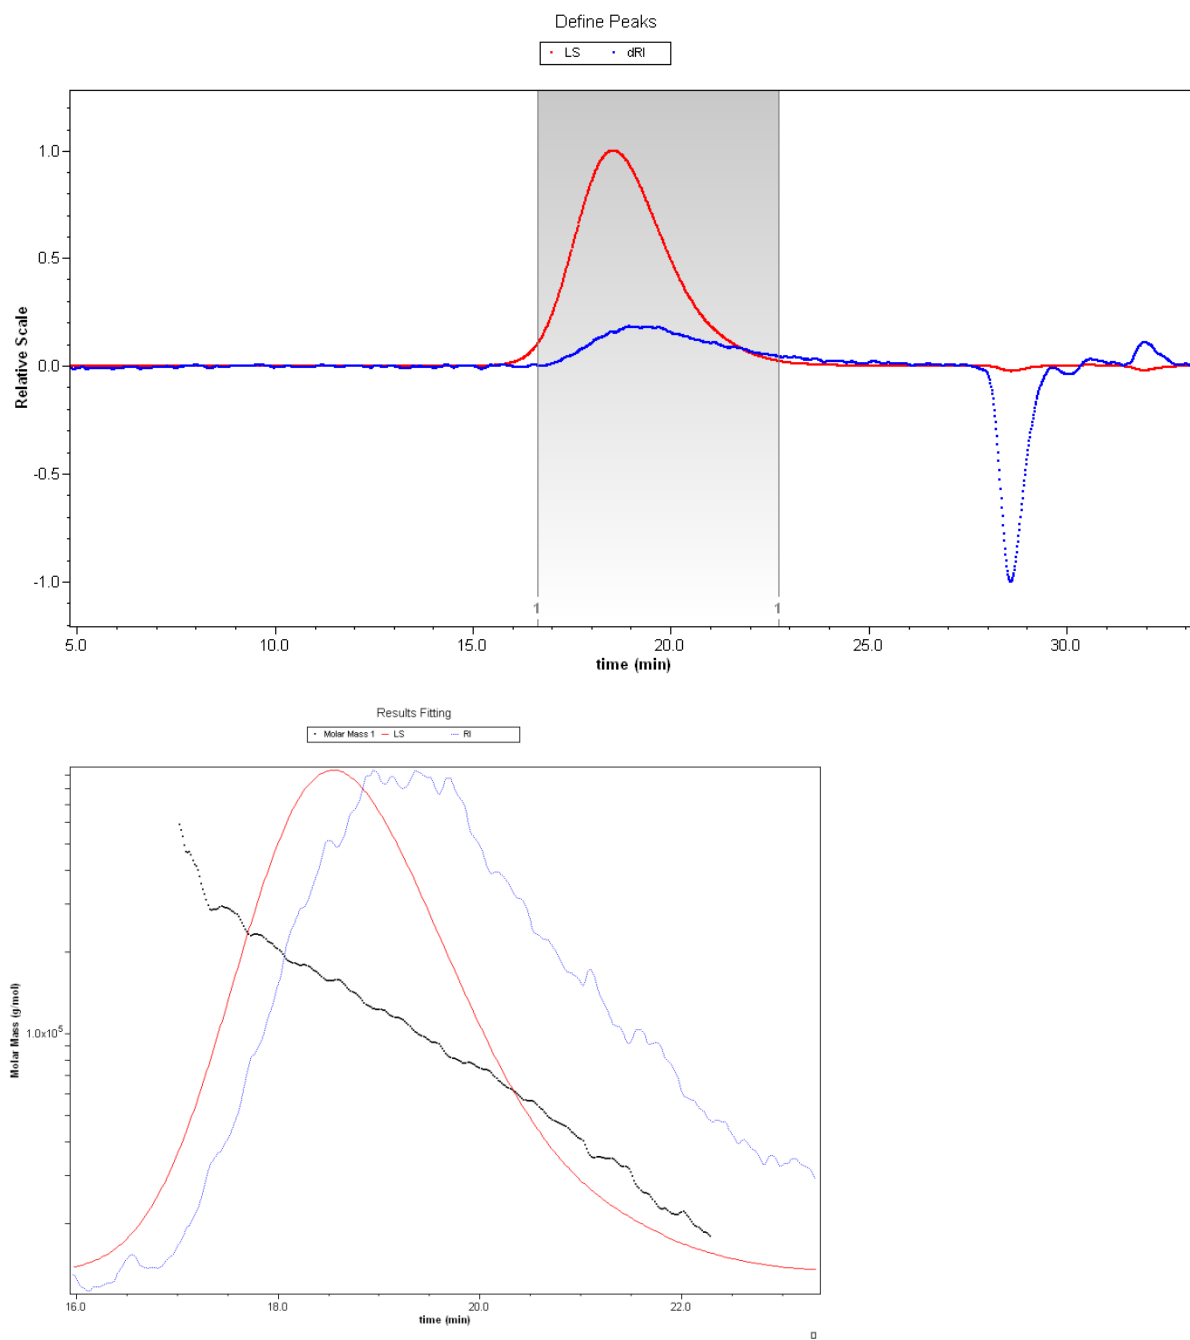

Figure S 27 REM-GTP (DMAA), table 1, entry 6, conversion 99%.

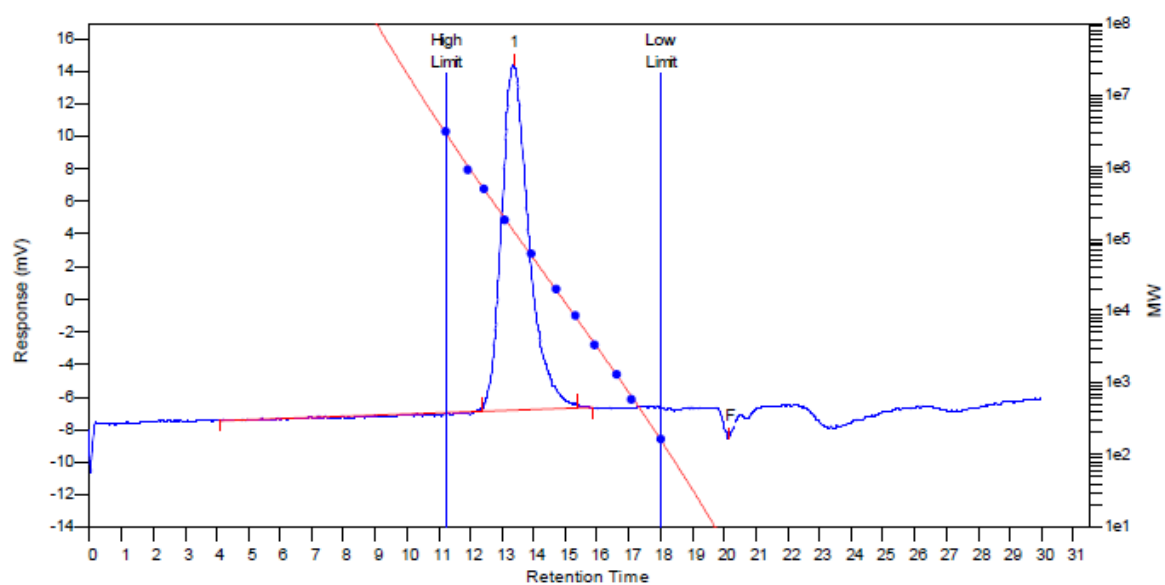

#### MW Averages

| Peak No | Mp     | Mn    | Mw     | Mz     | Mz+1   | Mv     | PD      |
|---------|--------|-------|--------|--------|--------|--------|---------|
| 1       | 129276 | 85510 | 130306 | 173311 | 216079 | 124085 | 1.52387 |
| 2       | 0      | 0     | 0      | 0      | 0      | 0      | 0       |

Figure S 28 ROP (BL), table 1, entry 7, conversion 89%.

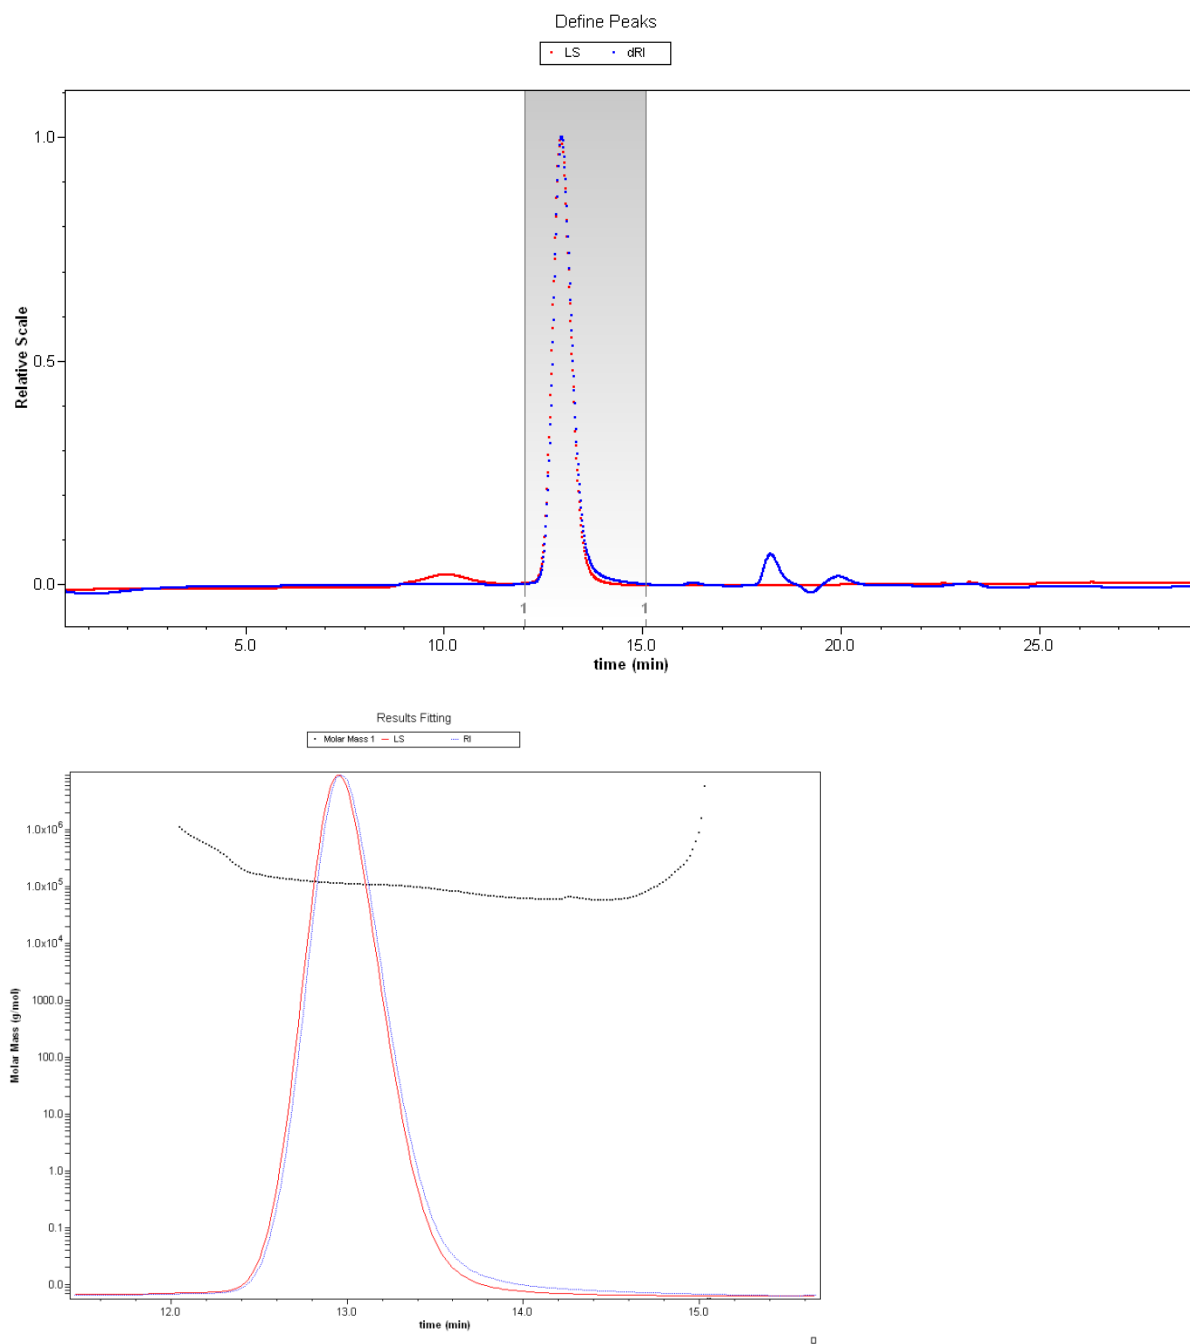

Figure S 29 REM-GTP (2VP), table 2, entry 1, conversion 99%.



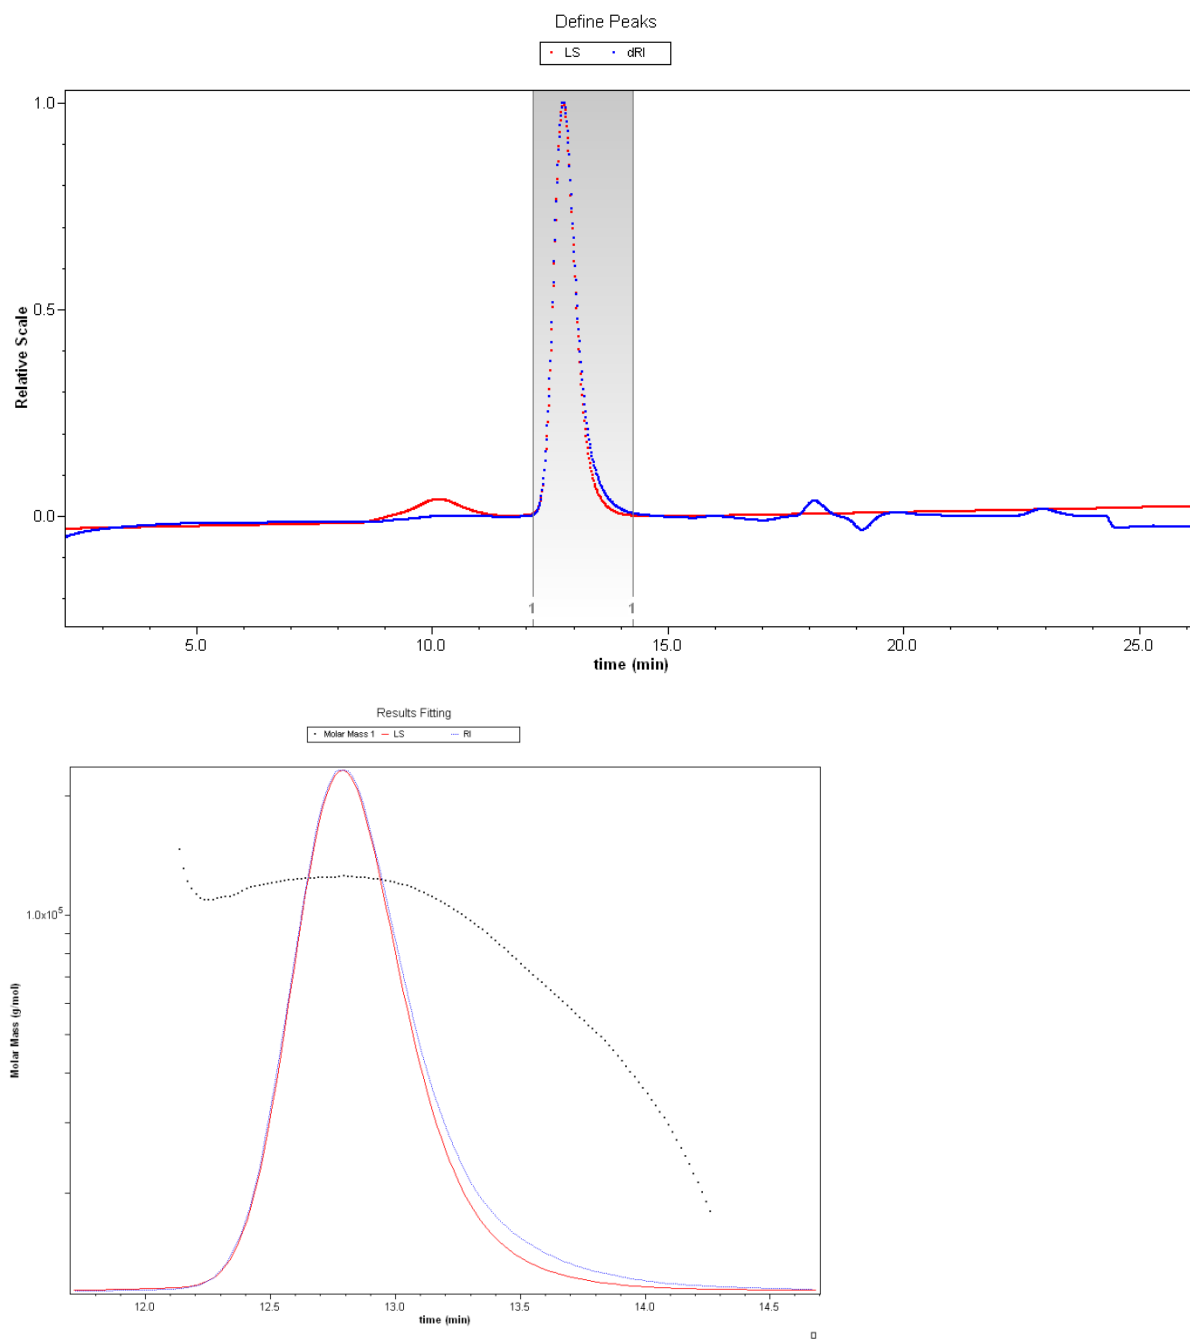

Figure S 30 REM-GTP (2VP), table 2, entry 2, conversion 82%.

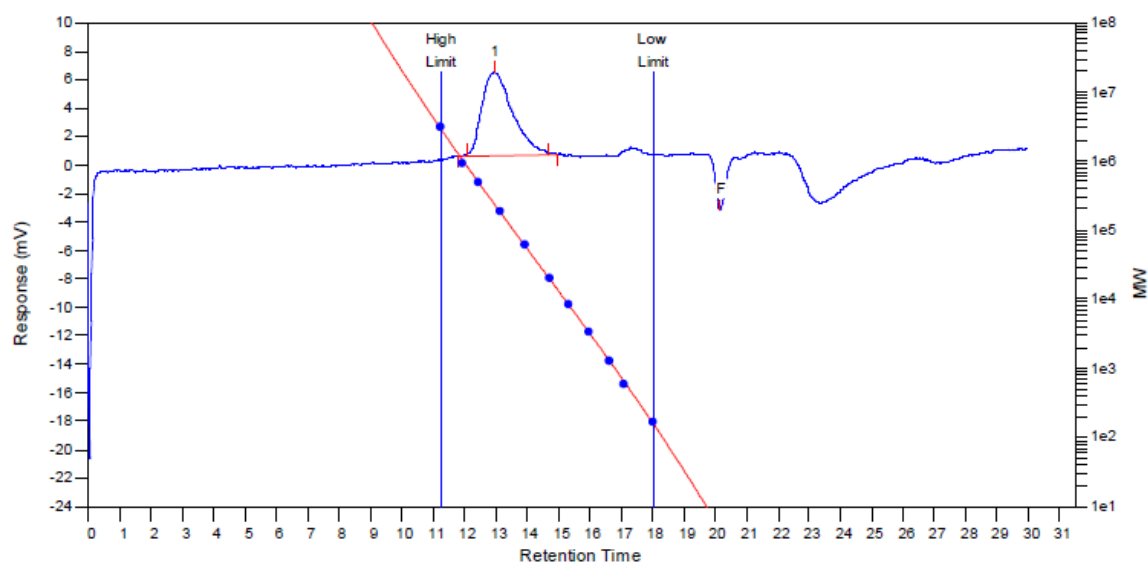

#### MW Averages

| Peak No | Mp     | Mn     | Mw     | Mz     | Mz+1   | Mv     | PD      |
|---------|--------|--------|--------|--------|--------|--------|---------|
| 1       | 232020 | 141585 | 222664 | 303406 | 374741 | 210730 | 1.57265 |
| 2       | 0      | 0      | 0      | 0      | 0      | 0      | 0       |

Figure S 31 ROP (BL), table 2, entry 3, conversion 99%.

## 2.7.2 Block copolymerization

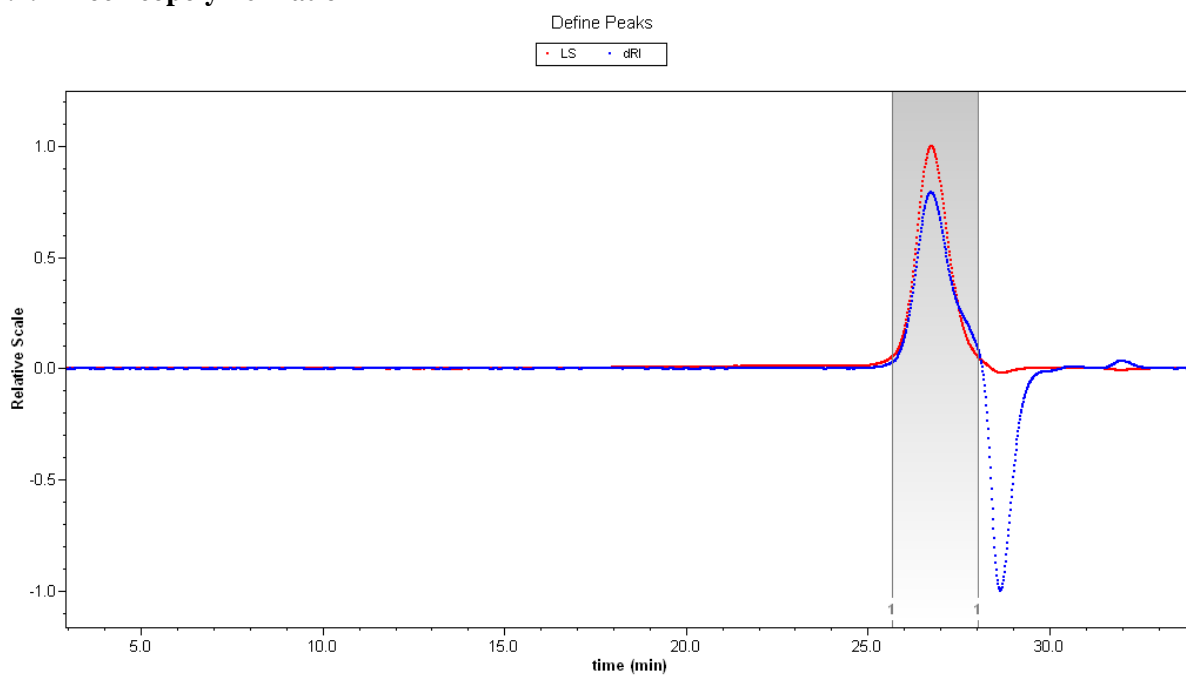

Figure S 32 REM-GTP (P2VP-b-PDEVp), table 4, entry 1.

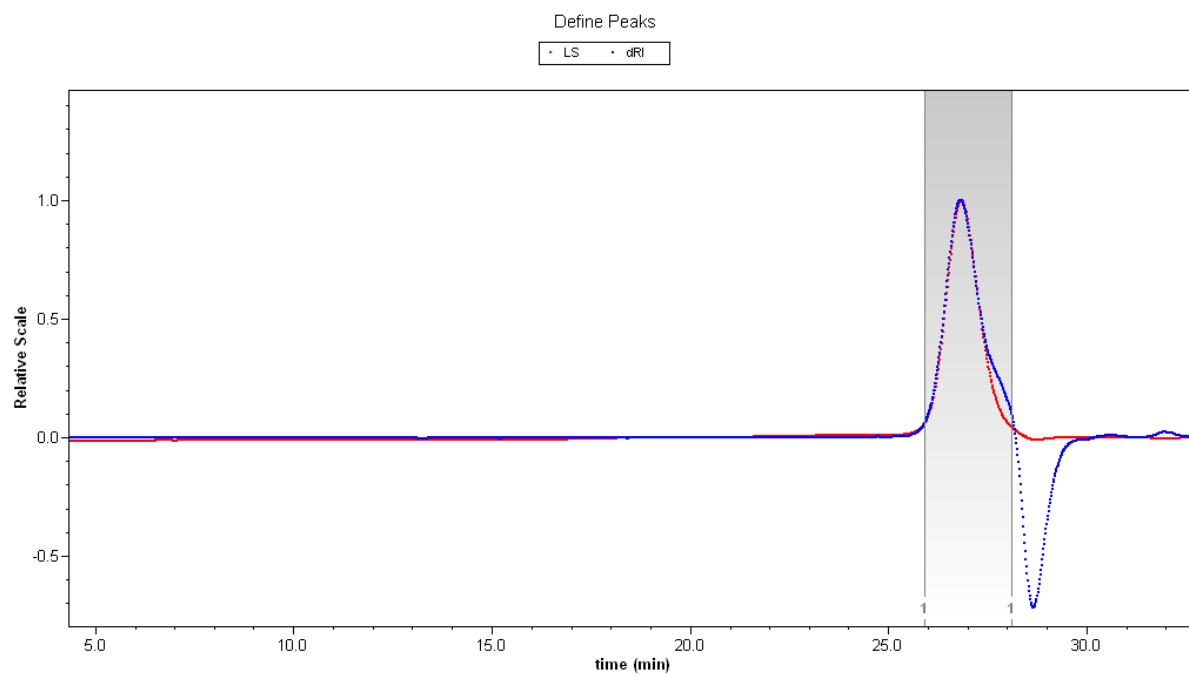

Figure S 33 REM-GTP (P2VP), table 4, entry 2 (aliquot sample).

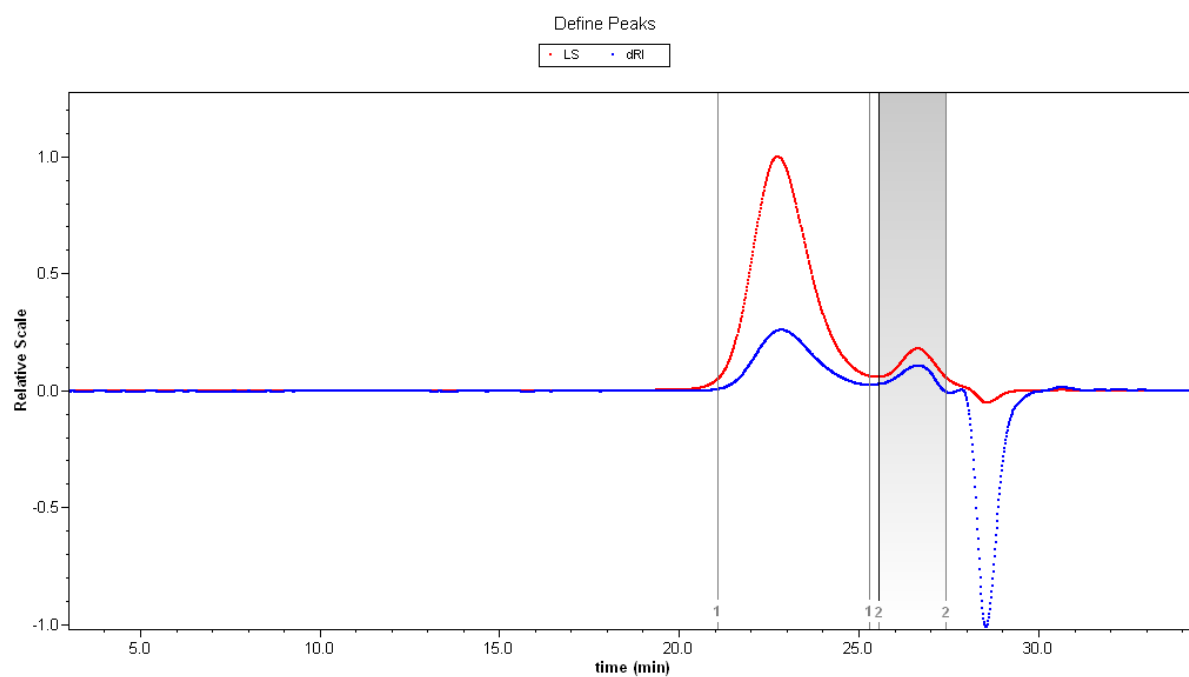

Figure S 34 REM-GTP (P2VP-b-PIPOx), table 4, entry 2.

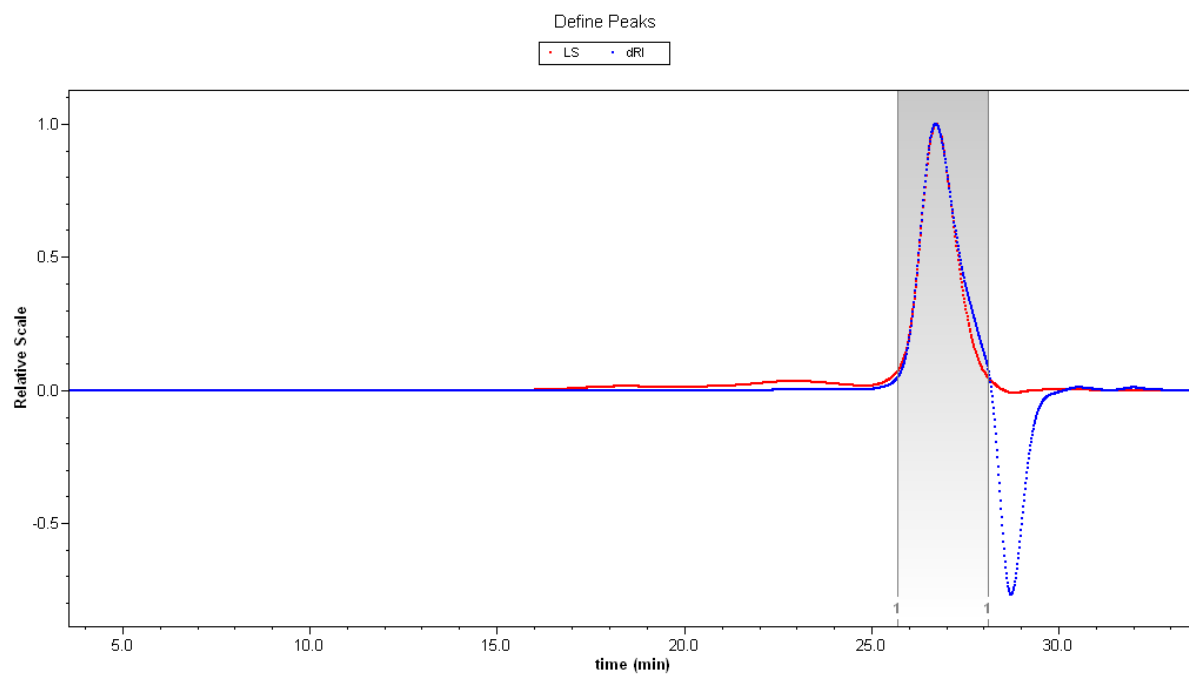

Figure S 35 REM-GTP (P2VP), table 4, entry 3 (aliquot sample).

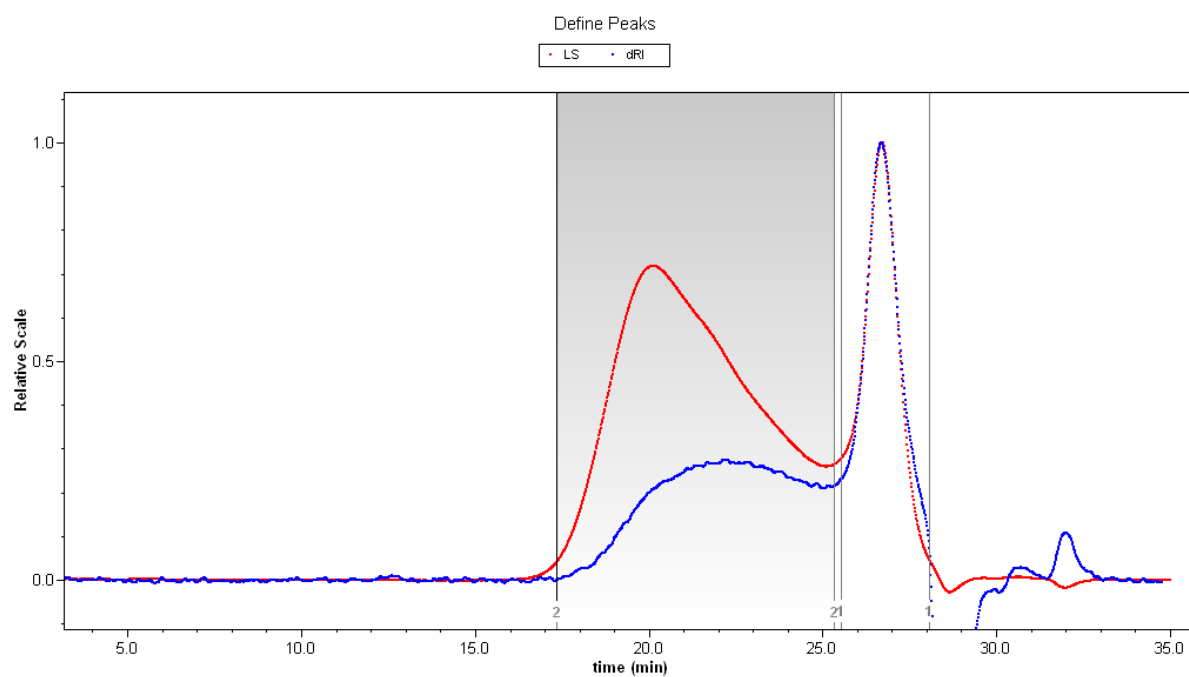

Figure S 36 REM-GTP (P2VP-b-PDMAA), table 4, entry 3.

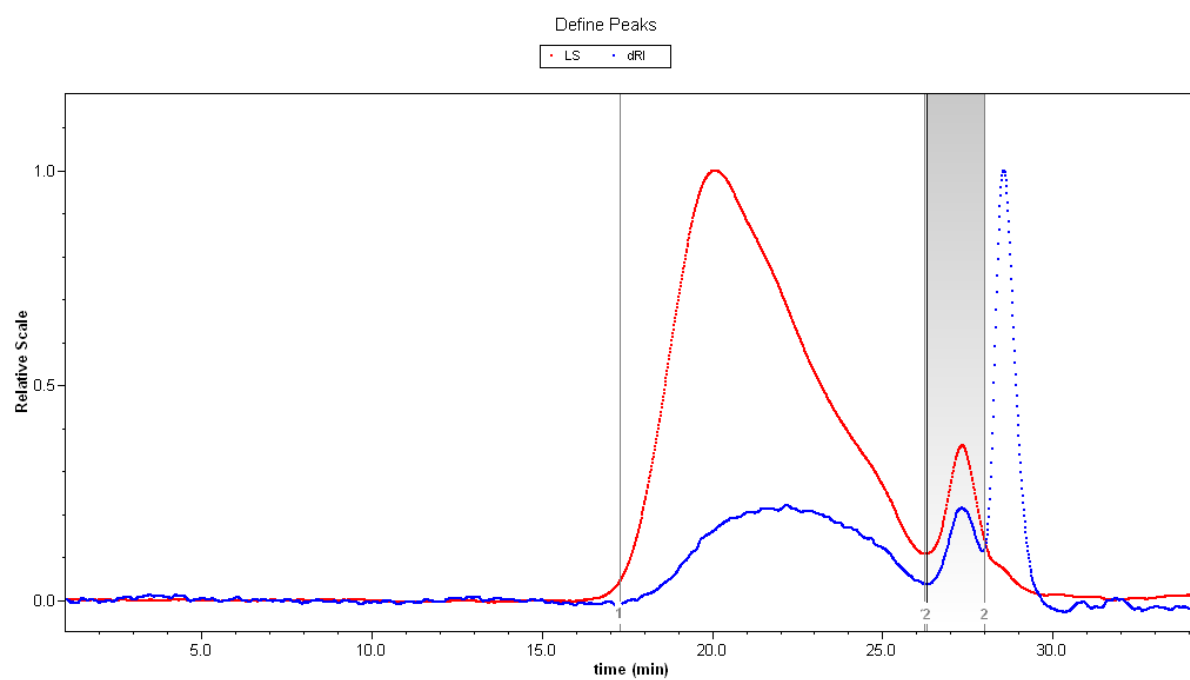

Figure S 37 REM-GTP (P2VP-b-PDMAA), table 4, entry 3: 2 hours washing with toluene.

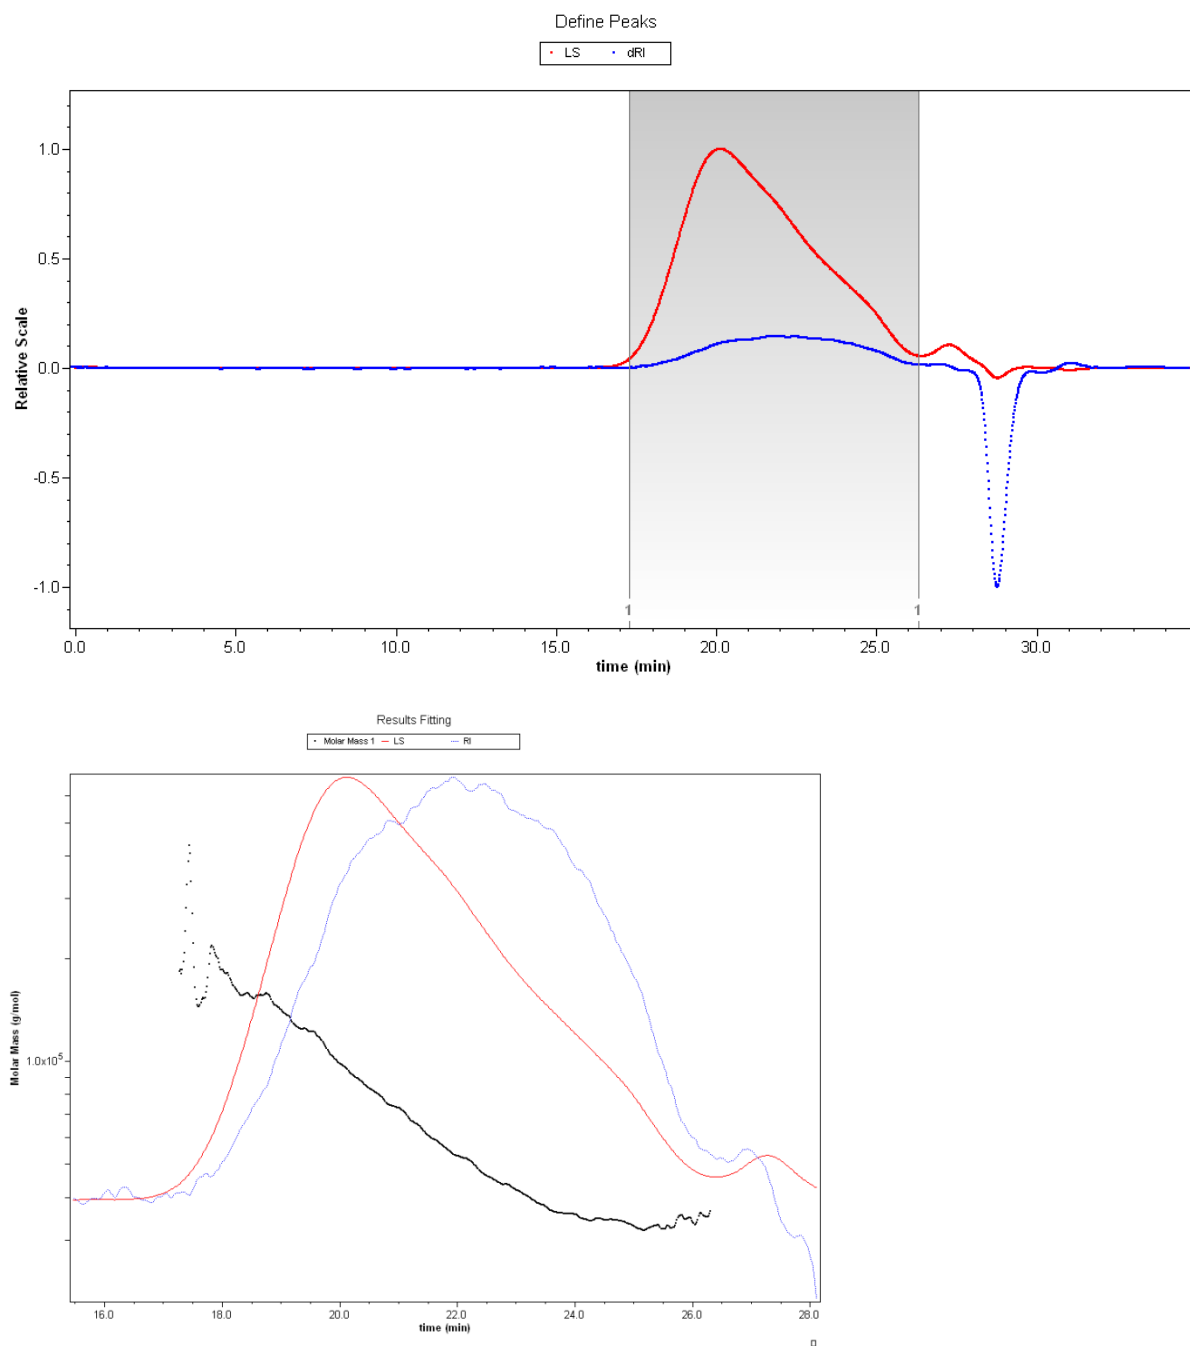

**Figure S 38 REM-GTP (P2VP-b-PDMAA), table 4, entry 3: 48 hours washing with toluene.**

1. Dimov, D. K.; Hogen-Esch, T. E. *Macromolecules* **1995**, 28, (22), 7394-400.
